# Supplementary material for: Machine learning using intrinsic genomic signatures for rapid classification of novel pathogens: COVID-19 case study
Source: PubMed Central journal article supplement (PMC7182198; doi:10.1371/journal.pone.0232391), 2020-04-24
Supplement: pone.0232391.s001.pdf [file pone.0232391.s001.pdf]

# Machine learning using intrinsic genomic signatures for rapid classification of novel pathogens: COVID-19 case study

## Supplementary Material

Gurjit S. Randhawa, Maximillian P.M. Soltysiak, Hadi El Roz, Camila P.E. de Souza, Kathleen A. Hill, and Lila Kari

### 1) Software availability

MLDSP-GUI is an open-source alignment-free tool with Graphical User Interface is publicly available for download at the following link (No license is required to download and use the tool):

<https://sourceforge.net/projects/mldsp-gui/>

MLDSP is an open-source alignment-free tool (MATLAB license required to run this program) available at the following link:

<https://github.com/grandhawa/MLDSP>

### 2) Spearman's rank correlation coefficient test results

The  $\rho$  values from the Spearman's correlation coefficient test for  $k=1$  to  $k=7$  are given in Supplementary Table S1. The P-value is  $<1e-5$  for  $k=2$  to  $k=6$ , 0.0833 for  $k=1$  with an exception of 0.3333 in case of *Deltacoronavirus*.

| 2019-nCoV vs.           | k=1 | k=2  | k=3  | k=4  | k=5  | k=6  | k=7  |
|-------------------------|-----|------|------|------|------|------|------|
| <i>Alphacoronavirus</i> | 1   | 0.97 | 0.96 | 0.96 | 0.94 | 0.88 | 0.7  |
| <i>Betacoronavirus</i>  | 1   | 0.95 | 0.95 | 0.95 | 0.94 | 0.89 | 0.74 |
| <i>Gammacoronavirus</i> | 1   | 0.93 | 0.91 | 0.92 | 0.90 | 0.83 | 0.63 |
| <i>Deltacoronavirus</i> | 0.8 | 0.98 | 0.94 | 0.92 | 0.90 | 0.81 | 0.60 |
| <i>Embecovirus</i>      | 1   | 0.85 | 0.88 | 0.88 | 0.86 | 0.79 | 0.59 |
| <i>Merbecovirus</i>     | 1   | 0.96 | 0.95 | 0.94 | 0.92 | 0.84 | 0.64 |
| <i>Nobecovirus</i>      | 1   | 0.89 | 0.83 | 0.83 | 0.8  | 0.73 | 0.54 |
| <i>Sarbecovirus</i>     | 1   | 0.98 | 0.97 | 0.97 | 0.95 | 0.88 | 0.72 |

Supplementary Table S1: Spearman's rank correlation coefficient ( $\rho$ ) value for  $k=1$  to  $k=7$ .

### 3) Dataset availability

All sequences downloaded from NCBI and Virus-Host-DB are uploaded to the SourceForge as fasta files. Accession numbers of 29 sequences downloaded from GISAID (28 COVID19 and a bat betacoronavirus RaTG13) are provided in 'GISAIDsequences.txt'.

<https://sourceforge.net/projects/mldsp-gui/files/COVID19Dataset/>

The sequences are downloaded from three databases: Virus-Host-DB, NCBI, and GISAID.

**Virus-Host-DB:**

All the viral sequences (apart from the ones downloaded from NCBI and GISAID) used in this study are obtained from the Virus-Host-DB available at:

<https://www.genome.jp/virushostdb/>

**NCBI**

Wuhan-Hu-1 complete genome (Accession: NC\_045512.2), bat-SL-CoVZC45 (Accession: MG772933.1), and bat-SL-CoVZXC21 (Accession: MG772934.1) are obtained from the Virus-Host-DB available at:

<https://www.ncbi.nlm.nih.gov/>

**GISAID**

28 2019-nCoV sequences and Beta-CoV-RaTG13 sequence (from Bat) are downloaded from the GISAID. We gratefully acknowledge the Authors, the Originating and Submitting Laboratories for their sequence and metadata shared through GISAID, which is used in this research. All submitters of 28 2019-nCoV sequences and 1 BetaCoV/Bat/RaTG13 sequence may be contacted directly via

[www.gisaid.org](http://www.gisaid.org)

| Accession ID                                                                                                                                                           | Originating lab                                               | Submitting lab                                                                            | Authors                                                                                                                                                                                                                                                                                                            |
|------------------------------------------------------------------------------------------------------------------------------------------------------------------------|---------------------------------------------------------------|-------------------------------------------------------------------------------------------|--------------------------------------------------------------------------------------------------------------------------------------------------------------------------------------------------------------------------------------------------------------------------------------------------------------------|
| <a href="#">EPI_ISL_404227</a>                                                                                                                                         | Zhejiang Provincial Center for Disease Control and Prevention | Department of Microbiology, Zhejiang Provincial Center for Disease Control and Prevention | Yin Chen, Yanjun Zhang, Haiyan Mao, Junhang Pan, Xiuyu Lou, Yiyu Lu, Juying Yan, Hanping Zhu, Jian Gao, Yan Feng, Yi Sun, Hao Yan, Zhen Li, Yisheng Sun, Liming Gong, Qiong Ge, Wen Shi, Xinying Wang, Wenwu Yao, Zhangnv Yang, Fang Xu, Chen Chen, Enfu Chen, Zhen Wang, Zhiping Chen, Jianmin Jiang, Chonggao Hu |
| <a href="#">EPI_ISL_404228</a>                                                                                                                                         | Zhejiang Provincial Center for Disease Control and Prevention | Department of Microbiology, Zhejiang Provincial Center for Disease Control and Prevention | Yanjun Zhang, Yin Chen, Haiyan Mao, Junhang Pan, Xiuyu Lou, Yiyu Lu, Juying Yan, Hanping Zhu, Jian Gao, Yan Feng, Yi Sun, Hao Yan, Zhen Li, Yisheng Sun, Liming Gong, Qiong Ge, Wen Shi, Xinying Wang, Wenwu Yao, Zhangnv Yang, Fang Xu, Chen Chen, Enfu Chen, Zhen Wang, Zhiping Chen, Jianmin Jiang, Chonggao Hu |
| <a href="#">EPI_ISL_402132</a>                                                                                                                                         | Wuhan Jinyintan Hospital                                      | Hubei Provincial Center for Disease Control and Prevention                                | Bin Fang, Xiang Li, Xiao Yu, Linlin Liu, Bo Yang, Faxian Zhan, Guojun Ye, Xixiang Huo, Junqiang Xu, Bo Yu, Kun Cai, Jing Li, Yongzhong Jiang.                                                                                                                                                                      |
| <a href="#">EPI_ISL_402127</a><br><a href="#">EPI_ISL_402128</a><br><a href="#">EPI_ISL_402129</a><br><a href="#">EPI_ISL_402130</a><br><a href="#">EPI_ISL_402124</a> | Wuhan Jinyintan Hospital                                      | Wuhan Institute of Virology, Chinese Academy of Sciences                                  | Peng Zhou, Xing-Lou Yang, Ding-Yu Zhang, Lei Zhang, Yan Zhu, Hao-Rui Si, Zhengli Shi                                                                                                                                                                                                                               |
| <a href="#">EPI_ISL_403963</a><br><a href="#">EPI_ISL_403962</a>                                                                                                       | Bamrasnaradura Hospital                                       | 1. Department of Medical Sciences, Ministry of Public Health, Thailand 2. Thai Red Cross  | Pilailuk, Okada; Siripaporn, Phuygun; Thanutsapa, Thanadachakul; Supaporn, Wacharapluesadee; Sittiporn, Parnmen; Warawan, Wongboot; Sunthareeya,                                                                                                                                                                   |

|                                                                                                                                                                                                          |                                                                                                     |                                                                                                                                         |                                                                                                                                                                                                                                                                                                                                                                                                         |
|----------------------------------------------------------------------------------------------------------------------------------------------------------------------------------------------------------|-----------------------------------------------------------------------------------------------------|-----------------------------------------------------------------------------------------------------------------------------------------|---------------------------------------------------------------------------------------------------------------------------------------------------------------------------------------------------------------------------------------------------------------------------------------------------------------------------------------------------------------------------------------------------------|
|                                                                                                                                                                                                          |                                                                                                     | Emerging Infectious Diseases - Health Science Centre 3. Department of Disease Control, Ministry of Public Health, Thailand              | Waicharoen; Rome, Buathong; Malinee, Chittaganpitch; Nanthawan, Mekha                                                                                                                                                                                                                                                                                                                                   |
| <a href="#">EPI_ISL_402120</a><br><a href="#">EPI_ISL_402119</a><br><a href="#">EPI_ISL_402121</a>                                                                                                       | National Institute for Viral Disease Control and Prevention, China CDC                              | National Institute for Viral Disease Control and Prevention, China CDC                                                                  | Wenjie Tan, Xiang Zhao, Wenling Wang, Xuejun Ma, Yongzhong Jiang, Roujian Lu, Ji Wang, Weimin Zhou, Peihua Niu, Peipei Liu, Faxian Zhan, Weifeng Shi, Baoying Huang, Jun Liu, Li Zhao, Yao Meng, Xiaozhou He, Fei Ye, Na Zhu, Yang Li, Jing Chen, Wenbo Xu, George F. Gao, Guizhen Wu                                                                                                                   |
| <a href="#">EPI_ISL_402123</a>                                                                                                                                                                           | Institute of Pathogen Biology, Chinese Academy of Medical Sciences & Peking Union Medical College   | Institute of Pathogen Biology, Chinese Academy of Medical Sciences & Peking Union Medical College                                       | Lili Ren, Jianwei Wang, Qi Jin, Zichun Xiang, Zhiqiang Wu, Chao Wu, Yiwei Liu                                                                                                                                                                                                                                                                                                                           |
| <a href="#">EPI_ISL_402125</a>                                                                                                                                                                           | unknown                                                                                             | National Institute for Communicable Disease Control and Prevention (ICDC) Chinese Center for Disease Control and Prevention (China CDC) | Zhang,Y.-Z., Wu,F., Chen,Y.-M., Pei,Y.-Y., Xu,L., Wang,W., Zhao,S., Yu,B., Hu,Y., Tao,Z.-W., Song,Z.-G., Tian,J.-H., Zhang,Y.-L., Liu,Y., Zheng,J.-J., Dai,F.-H., Wang,Q.-M., She,J.-L. and Zhu,T.-Y.                                                                                                                                                                                                   |
| <a href="#">EPI_ISL_403931</a><br><a href="#">EPI_ISL_403928</a><br><a href="#">EPI_ISL_403930</a><br><a href="#">EPI_ISL_403929</a>                                                                     | Institute of Pathogen Biology, Chinese Academy of Medical Sciences & Peking Union Medical College   | Institute of Pathogen Biology, Chinese Academy of Medical Sciences & Peking Union Medical College                                       | Lili Ren, Jianwei Wang, Qi Jin, Zichun Xiang, Zhiqiang Wu, Chao Wu, Yiwei Liu                                                                                                                                                                                                                                                                                                                           |
| <a href="#">EPI_ISL_403937</a><br><a href="#">EPI_ISL_403936</a><br><a href="#">EPI_ISL_403935</a><br><a href="#">EPI_ISL_403934</a><br><a href="#">EPI_ISL_403933</a><br><a href="#">EPI_ISL_403932</a> | Guangdong Provincial Center for Diseases Control and Prevention; Guangdong Provincial Public Health | Department of Microbiology, Guangdong Provincial Center for Diseases Control and Prevention                                             | Min Kang, Jie Wu, Jing Lu, Tao Liu, Baisheng Li, Shujiang Mei, Feng Ruan, Lifeng Lin, Changwen Ke, Haojie Zhong, Yingtao Zhang, Lirong Zou, Xuguang Chen, Qi Zhu, Jianpeng Xiao, Jianxiang Geng, Zhe Liu, Jianxiong Hu, Weilin Zeng, Xing Li, Yuhuang Liao, Xiujuan Tang, Songjian Xiao, Ying Wang, Yingchao Song, Xue Zhuang, Lijun Liang, Guan hao He, Huihong Deng, Tie Song, Jianfeng He, Wenjun Ma |
| <a href="#">EPI_ISL_404895</a>                                                                                                                                                                           | Providence Regional Medical Center                                                                  | Division of Viral Diseases, Centers for Disease Control and Prevention                                                                  | Queen,K., Tao,Y., Li,Y., Paden,C.R., Lu,X., Zhang,J., Gerber,S.I., Lindstrom,S.                                                                                                                                                                                                                                                                                                                         |

|                                                |                                                          |                                                                                                                         |                                                                                                                                                                                                                                                   |
|------------------------------------------------|----------------------------------------------------------|-------------------------------------------------------------------------------------------------------------------------|---------------------------------------------------------------------------------------------------------------------------------------------------------------------------------------------------------------------------------------------------|
| <a href="#">EPI_ISL_404253</a>                 | IL Department of Public Health Chicago Laboratory        | Pathogen Discovery, Respiratory Viruses Branch, Division of Viral Diseases, Centers for Diseases Control and Prevention | Ying Tao, Krista Queen, Clinton R. Paden, Jing Zhang, Yan Li, Anna Uehara, Xiaoyan Lu, Brian Lynch, Senthil Kumar K. Sakthivel, Brett L. Whitaker, Shifaq Kamili, Lijuan Wang, Janna' R. Murray, Susan I. Gerber, Stephen Lindstrom, Suxiang Tong |
| <a href="#">EPI_ISL_405839</a>                 | The University of Hong Kong - Shenzhen Hospital          | Li Ka Shing Faculty of Medicine, The University of Hong Kong                                                            | Chan,J.F.-W., Yuan,S., Kok,K.H., To,K.K.-W., Chu,H., Yang,J., Xing,F., Liu,J., Yip,C.C.-Y., Poon,R.W.-S., Tsai,H.W., Lo,S.K.-F., Chan,K.H., Poon,V.K.-M., Chan,W.M., Ip,J.D., Cai,J.P., Cheng,V.C.-C., Chen,H., Hui,C.K.-M. and Yuen,K.Y.         |
| <a href="#">EPI_ISL_402131</a><br>(Bat RaTG13) | Wuhan Institute of Virology, Chinese Academy of Sciences | Wuhan Institute of Virology, Chinese Academy of Sciences                                                                | Yan Zhu, Ping Yu, Bei Li, Ben Hu, Hao-Rui Si, Xing-Lou Yang, Peng Zhou, Zheng-Li Shi                                                                                                                                                              |

**Supplementary Table S2:** Accession IDs of the Sequences downloaded from the GISAID.

The accession numbers and the sources for all the used sequences are given below:

| <b>Test-1; Source: Virus-Host-DB</b>                                                                                                                                                                                                                                                                                                                                                                                                                                                                                                                                                                                                                                                                                                                                                                                                                                                                                                                                                                                                                                                                                                                                                                                                                                                                                                                                                                                                                                                                                                                                                                                                                                                                                                                                                                                                                                                                                                                 |
|------------------------------------------------------------------------------------------------------------------------------------------------------------------------------------------------------------------------------------------------------------------------------------------------------------------------------------------------------------------------------------------------------------------------------------------------------------------------------------------------------------------------------------------------------------------------------------------------------------------------------------------------------------------------------------------------------------------------------------------------------------------------------------------------------------------------------------------------------------------------------------------------------------------------------------------------------------------------------------------------------------------------------------------------------------------------------------------------------------------------------------------------------------------------------------------------------------------------------------------------------------------------------------------------------------------------------------------------------------------------------------------------------------------------------------------------------------------------------------------------------------------------------------------------------------------------------------------------------------------------------------------------------------------------------------------------------------------------------------------------------------------------------------------------------------------------------------------------------------------------------------------------------------------------------------------------------|
| <b>Adenoviridae</b>                                                                                                                                                                                                                                                                                                                                                                                                                                                                                                                                                                                                                                                                                                                                                                                                                                                                                                                                                                                                                                                                                                                                                                                                                                                                                                                                                                                                                                                                                                                                                                                                                                                                                                                                                                                                                                                                                                                                  |
| AB448767,AC_000007,JN880453,JN880454,JN880455,JN880456,JN935766,JQ326209,JQ776547,KC529648,KC693021,KF268207,AC_000008,KF279629,KF528688,KF802426,KF906413,KM591901,KM591902,KM591903,NC_000899,NC_000942,NC_001405,AC_000009,NC_001454,NC_001460,NC_001720,NC_001734,NC_001813,NC_001876,NC_001958,NC_002501,NC_002513,NC_002685,AC_000010,NC_002702,NC_003266,NC_004037,NC_006144,NC_006879,NC_009989,NC_010956,NC_011202,NC_011203,NC_012584,AC_000011,NC_012959,NC_014564,NC_014899,NC_014969,NC_015225,NC_015323,NC_015455,NC_015932,NC_016437,NC_016895,AC_000012,NC_017825,NC_017979,NC_020074,NC_020485,NC_020487,NC_021168,NC_021221,NC_022266,NC_022612,NC_022613,AC_000013,NC_024150,NC_024474,NC_024486,NC_024684,NC_025678,NC_025962,NC_027705,NC_027708,NC_028103,NC_028105,AC_000014,NC_028107,NC_028113,NC_029898,NC_029899,NC_029902,NC_030116,NC_030792,NC_030860,NC_030874,NC_031503,AC_000016,NC_031948,NC_032105,NC_034382,NC_034626,NC_034834,NC_035072,NC_035207,NC_035619,NC_038332,NC_038333,AC_000017,NC_038334,NC_039032,NC_040811,NC_043094,NC_043405,NC_043696,U46933,X73487,Y09598,AB724351,AC_000018,AC_000019,AC_000020,AC_000189,AC_000190,AC_000191,AF036092,AF083975,AF108105,AM749299,AB765926,AP012285,AP012302,AY458656,AY737797,AY737798,AY803294,AY849321,AY875648,DQ086466,DQ315364,AC_000001,DQ393829,DQ792570,DQ900900,DQ923122,EF121005,EF564601,FJ025899,FJ025900,FJ025901,FJ025902,AC_000002,FJ025903,FJ025904,FJ025905,FJ025906,FJ025907,FJ025908,FJ025909,FJ025910,FJ025911,FJ025912,AC_000003,FJ025913,FJ025914,FJ025915,FJ025916,FJ025917,FJ025918,FJ025919,FJ025920,FJ025921,FJ025922,AC_000004,FJ025923,FJ025924,FJ025925,FJ025926,FJ025927,FJ025928,FJ025929,FJ025930,FJ349096,FJ404771,AC_000005,FJ597732,FJ643676,FJ824826,GQ384080,GU191019,HM770721,HQ241818,HQ241820,HQ883276,JF964962,AC_000006,JN860676,JN860677,JN860678,JN860679,JN860680,JN880448,JN880449,JN880450,JN880451,JN880452 |
| <b>Anelloviridae</b>                                                                                                                                                                                                                                                                                                                                                                                                                                                                                                                                                                                                                                                                                                                                                                                                                                                                                                                                                                                                                                                                                                                                                                                                                                                                                                                                                                                                                                                                                                                                                                                                                                                                                                                                                                                                                                                                                                                                 |
| AM711976,AM712003,AM712004,AM712030,AM712031,AM712032,AM712033,AM712034,FR823283,GU450331,HQ335082,HQ335083,HQ335084,HQ335085,JN704611,KJ194622,KM262781,KM262785,NC_001427,NC_002076,NC_002195,NC_007013,NC_007014,NC_009225,NC_012126,NC_014068,NC_014069,NC_014070,NC_014071,NC_014072,NC_014073,NC_014074,NC_014075,NC_014076,NC_014077,NC_014078,NC_014079,NC_014080,NC_014081,NC_014082,NC_014083,NC_014084,NC_0140                                                                                                                                                                                                                                                                                                                                                                                                                                                                                                                                                                                                                                                                                                                                                                                                                                                                                                                                                                                                                                                                                                                                                                                                                                                                                                                                                                                                                                                                                                                            |

85,NC\_014086,NC\_014087,NC\_014088,NC\_014089,NC\_014090,NC\_014091,NC\_014092,NC\_014093,NC\_014094,NC\_014095,NC\_014096,NC\_014097,NC\_014480,NC\_015212,NC\_015396,NC\_015783,NC\_017091,NC\_018401,NC\_020498,NC\_022788,NC\_022789,NC\_024890,NC\_024891,NC\_024908,NC\_025215,NC\_025726,NC\_025727,NC\_025966,NC\_026138,NC\_026662,NC\_026663,NC\_026664,NC\_026764,NC\_026765,NC\_027059,NC\_027430,NC\_030297,NC\_030650,NC\_034978,NC\_035135,NC\_035136,NC\_035192,NC\_038336,NC\_038337,NC\_038338,NC\_038339,NC\_038340,NC\_038341,NC\_038342,NC\_038343,NC\_038344,NC\_038345,NC\_038346,NC\_038347,NC\_038348,NC\_038349,NC\_038350,NC\_038351,NC\_038352,NC\_038353,NC\_038354,NC\_038355,NC\_038356,NC\_038357,NC\_038358,NC\_038359,NC\_038360,NC\_038361,NC\_038362,NC\_038363,NC\_040531,NC\_040546,NC\_040547,NC\_040617,NC\_040618,NC\_040668,NC\_040686,NC\_040687,NC\_040720,NC\_040801,NC\_043413,NC\_043414,NC\_043415

**Caudovirales**

AB626963,AB746912,AB757801,AF527608,AP011956,AY526908,AY526909,CP000711,CP008753,DQ113772,DQ121662,DQ222851,DQ289556,DQ394806,DQ394807,DQ394808,DQ394809,DQ394810,DQ426905,DQ838728,EU056923,EU568876,EU622808,FQ482084,GQ303261,GQ478082,GQ478083,GQ478085,GQ478087,GU196281,HE614282,HE956707,HE983844,HG428758,HG793132,HG796219,HG796220,HG796221,HM152765,HQ110083,HQ634152,HQ641341,HQ641343,HQ641344,HQ641346,JF314845,JF767210,JF773396,JN175269,JN254801,JN255163,JN699002,JN811560,JQ067085,JQ267518,JQ691610,JQ740790,JQ740791,JQ740792,JQ740793,JQ740794,JQ740795,JQ740796,JQ740797,JQ740798,JQ740799,JQ740800,JQ740801,JQ740802,JQ740803,JQ740805,JQ740806,JQ740807,JQ740808,JQ740809,JQ740810,JQ740811,JQ740812,JQ740814,JQ780163,JQ957925,JQ965700,JQ965701,JQ965702,JQ965703,JX000007,JX174275,JX274646,JX274647,JX403939,JX409894,JX409895,JX421753,JX483873,JX483874,JX483875,JX483879,JX483880,JX564242,JX570703,JX570707,JX570708,JX570711,JX681814,KC182543,KC182544,KC182545,KC182548,KC182549,KC182550,KC330681,KC333879,KC348598,KC348599,KC348600,KC348601,KC348602,KC348603,KC348604,KC413987,KC413988,KC522412,KC542353,KC556893,KC556894,KC556895,KC556896,KC556898,KC787107,KC787108,KC821615,KC821627,KC911856,KC911857,KC969441,KF030445,KF302032,KF302033,KF302035,KF302036,KF302037,KF591601,KF669657,KF676640,KF751793,KF751794,KF751795,KF751796,KF751797,KF771236,KF800937,KJ018210,KJ021043,KJ417497,KJ502657,KJ545483,KJ572844,KJ578763,KJ578764,KJ578766,KJ578769,KJ578771,KJ578775,KJ578777,KJ617393,KJ725374,KM058087,KM091442,KM091443,KM091444,KM233455,KM591905,KM612260,KM612261,KM612262,KM612263,KM612265,KM923970, KP017310, KP209285, KP296794, KP791807, KP869108, KR131710, LK985321, LN610580, LN681534, M11813, NC\_000871, NC\_000872, NC\_000896, NC\_000929, NC\_000935, NC\_001271, NC\_001317, NC\_001416, NC\_001604, NC\_001609, NC\_001629, NC\_001697, NC\_001706, NC\_001825, NC\_001835, NC\_001895, NC\_001900, NC\_001901, NC\_001902, NC\_001909, NC\_001978, NC\_002072, NC\_002166, NC\_002167, NC\_002185, NC\_002214, NC\_002321, NC\_002371, NC\_002486, NC\_002515, NC\_002519, NC\_002628, NC\_002649, NC\_002661, NC\_002666, NC\_002667, NC\_002668, NC\_002669, NC\_002670, NC\_002671, NC\_002703, NC\_002730, NC\_002747, NC\_002796, NC\_003050, NC\_003085, NC\_003157, NC\_003216, NC\_003278, NC\_003288, NC\_003291, NC\_003298, NC\_003313, NC\_003315, NC\_003356, NC\_003390, NC\_003444, NC\_003524, NC\_003907, NC\_004066, NC\_004112, NC\_004165, NC\_004166, NC\_004167, NC\_004302, NC\_004303, NC\_004305, NC\_004313, NC\_004333, NC\_004348, NC\_004456, NC\_004466, NC\_004584, NC\_004585, NC\_004586, NC\_004587, NC\_004588, NC\_004589, NC\_004615, NC\_004616, NC\_004617, NC\_004664, NC\_004665, NC\_004678, NC\_004679, NC\_004740, NC\_004745, NC\_004746, NC\_004775, NC\_004777, NC\_004814, NC\_004821, NC\_004827, NC\_004827, NC\_004831, NC\_004902, NC\_004996, NC\_005045, NC\_005056, NC\_005069, NC\_005178, NC\_005263, NC\_005294, NC\_005340, NC\_005342, NC\_005344, NC\_005345, NC\_005354, NC\_005355, NC\_005356, NC\_005357, NC\_005822, NC\_005833, NC\_005841, NC\_005879, NC\_005882, NC\_005884, NC\_005886, NC\_005887, NC\_005891, NC\_005893, NC\_006356, NC\_006548, NC\_006557, NC\_006882, NC\_006936, NC\_006940, NC\_006949, NC\_006953, NC\_007019, NC\_007046, NC\_007047, NC\_007048, NC\_007049, NC\_007050, NC\_007051, NC\_007052, NC\_007053, NC\_007054, NC\_007055, NC\_007056, NC\_007057, NC\_007058, NC\_007059, NC\_007060, NC\_007061, NC\_007062, NC\_007063, NC\_007064, NC\_007065, NC\_007145, NC\_007149, NC\_007291, NC\_007456, NC\_007458, NC\_007497, NC\_007501, NC\_007603, NC\_007637, NC\_007709, NC\_007710, NC\_007734, NC\_007804, NC\_007805, NC\_007806, NC\_007807, NC\_007808, NC\_007814, NC\_007924, NC\_007967, NC\_008152, NC\_008193, NC\_008201, NC\_008202, NC\_008265, NC\_008363, NC\_008364, NC\_008367, NC\_008370, NC\_008371, NC\_008376, NC\_008583, NC\_008617, NC\_008689, NC\_008694, NC\_008695, NC\_008717, NC\_008721, NC\_008722, NC\_008723, NC\_008798, NC\_008799, NC\_009014, NC\_009016, NC\_009018, NC\_009232, NC\_009234, NC\_009235, NC\_009236, NC\_009237, NC\_009382, NC\_009514, NC\_009526, NC\_009531, NC\_009540, NC\_009541, NC\_009542, NC\_009543, NC\_009551, NC\_009552, NC\_009554, NC\_009603, NC\_009604,

NC\_009643,NC\_009737,NC\_009761,NC\_009762,NC\_009763,NC\_009799,NC\_009810,NC\_009812,NC\_009813,NC\_009814,NC\_009815,NC\_009818,NC\_009819,NC\_009875,NC\_009935,NC\_009936,NC\_009990,NC\_010147,NC\_010179,NC\_010275,NC\_010325,NC\_010326,NC\_010342,NC\_010353,NC\_010363,NC\_010463,NC\_010495,NC\_010807,NC\_010808,NC\_010945,NC\_011038,NC\_011040,NC\_011042,NC\_011043,NC\_011045,NC\_011046,NC\_011048,NC\_011085,NC\_011104,NC\_011107,NC\_011142,NC\_011201,NC\_011216,NC\_011222,NC\_011267,NC\_011291,NC\_011308,NC\_011318,NC\_011344,NC\_011373,NC\_011534,NC\_011551,NC\_011589,NC\_011611,NC\_011612,NC\_011613,NC\_011614,NC\_011645,NC\_011646,NC\_011801,NC\_011802,NC\_011976,NC\_012223,NC\_012418,NC\_012419,NC\_012662,NC\_012742,NC\_012753,NC\_012756,NC\_012784,NC\_012788,NC\_012884,NC\_013055,NC\_013059,NC\_013152,NC\_013153,NC\_013154,NC\_013155,NC\_013195,NC\_013594,NC\_013597,NC\_013598,NC\_013599,NC\_013600,NC\_013638,NC\_013643,NC\_013644,NC\_013645,NC\_013646,NC\_013647,NC\_013648,NC\_013649,NC\_013651,NC\_013696,NC\_014229,NC\_014460,NC\_014900,NC\_015158,NC\_015159,NC\_015208

**Geminiviridae**

KF229718,KF229722,KF652077,KJ628309,KM189819,L14460,L14461,L39638,NC\_000869,NC\_000870,NC\_000882,NC\_001346,NC\_001359,NC\_001369,NC\_001412,NC\_001438,NC\_001439,NC\_001466,NC\_001467,NC\_001468,NC\_001478,NC\_001507,NC\_001508,NC\_001647,NC\_001828,NC\_001868,NC\_001917,NC\_001928,NC\_001929,NC\_001930,NC\_001931,NC\_001932,NC\_001933,NC\_001934,NC\_001935,NC\_001936,NC\_001937,NC\_001938,NC\_001939,NC\_001983,NC\_001984,NC\_002046,NC\_002047,NC\_002048,NC\_002049,NC\_002510,NC\_002543,NC\_002555,NC\_002556,NC\_002817,NC\_002981,NC\_002984,NC\_002985,NC\_003199,NC\_003326,NC\_003357,NC\_003379,NC\_003418,NC\_003434,NC\_003493,NC\_003504,NC\_003505,NC\_003556,NC\_003609,NC\_003664,NC\_003665,NC\_003708,NC\_003709,NC\_003722,NC\_003744,NC\_003803,NC\_003804,NC\_003822,NC\_003825,NC\_003828,NC\_003830,NC\_003831,NC\_003856,NC\_003857,NC\_003860,NC\_003861,NC\_003862,NC\_003865,NC\_003866,NC\_003867,NC\_003868,NC\_003887,NC\_003891,NC\_003896,NC\_003897,NC\_003898,NC\_004005,NC\_004042,NC\_004043,NC\_004044,NC\_004071,NC\_004090,NC\_004091,NC\_004096,NC\_004097,NC\_004098,NC\_004099,NC\_004100,NC\_004101,NC\_004147,NC\_004153,NC\_004192,NC\_004300,NC\_004356,NC\_004558,NC\_004559,NC\_004569,NC\_004580,NC\_004581,NC\_004582,NC\_004583,NC\_004607,NC\_004608,NC\_004609,NC\_004611,NC\_004612,NC\_004613,NC\_004614,NC\_004618,NC\_004625,NC\_004626,NC\_004627,NC\_004628,NC\_004630,NC\_004634,NC\_004635,NC\_004637,NC\_004638,NC\_004639,NC\_004640,NC\_004641,NC\_004642,NC\_004644,NC\_004645,NC\_004646,NC\_004647,NC\_004648,NC\_004650,NC\_004651,NC\_004654,NC\_004655,NC\_004656,NC\_004657,NC\_004658,NC\_004659,NC\_004660,NC\_004661,NC\_004662,NC\_004673,NC\_004674,NC\_004675,NC\_004676,NC\_004732,NC\_004755,NC\_004824,NC\_004825,NC\_005031,NC\_005032,NC\_005319,NC\_005320,NC\_005321,NC\_005330,NC\_005331,NC\_005338,NC\_005347,NC\_005348,NC\_005635,NC\_005636,NC\_005807,NC\_005811,NC\_005812,NC\_005842,NC\_005843,NC\_005844,NC\_005845,NC\_005846,NC\_005850,NC\_005851,NC\_005852,NC\_005853,NC\_005855,NC\_006358,NC\_006359,NC\_006384,NC\_006631,NC\_006874,NC\_006876,NC\_006995,NC\_007210,NC\_007211,NC\_007290,NC\_007338,NC\_007339,NC\_007638,NC\_007723,NC\_007724,NC\_007726,NC\_007727,NC\_007730,NC\_007965,NC\_007966,NC\_008056,NC\_008057,NC\_008058,NC\_008059,NC\_008236,NC\_008267,NC\_008283,NC\_008284,NC\_008299,NC\_008304,NC\_008305,NC\_008316,NC\_008317,NC\_008329,NC\_008373,NC\_008374,NC\_008377,NC\_008492,NC\_008493,NC\_008494,NC\_008495,NC\_008517,NC\_008559,NC\_008779,NC\_008780,NC\_008793,NC\_008794,NC\_009030,NC\_009031,NC\_009088,NC\_009354,NC\_009451,NC\_009490,NC\_009491,NC\_009545,NC\_009546,NC\_009547,NC\_009548,NC\_009549,NC\_009550,NC\_009553,NC\_009605,NC\_009606,NC\_009607,NC\_009612,NC\_009644,NC\_009645,NC\_009646,NC\_009647,NC\_010238,NC\_010293,NC\_010294,NC\_010307,NC\_010313,NC\_010352,NC\_010417,NC\_010435,NC\_010439,NC\_010440,NC\_010441,NC\_010618,NC\_010647,NC\_010648,NC\_010713,NC\_010714,NC\_010791,NC\_010792,NC\_010797,NC\_010799,NC\_010812,NC\_010818,NC\_010833,NC\_010834,NC\_010835,NC\_010836,NC\_010837,NC\_010838,NC\_010839,NC\_010840,NC\_010946,NC\_010947,NC\_010948,NC\_010949,NC\_010950,NC\_010951,NC\_010952,NC\_010953,NC\_011024,NC\_011052,NC\_011058,NC\_011096,NC\_011135,NC\_011181,NC\_011182,NC\_011268,NC\_011309,NC\_011346,NC\_011347,NC\_011348,NC\_011583,NC\_011584,NC\_011804,NC\_011805,NC\_011919,NC\_012041,NC\_012118,NC\_012120,NC\_012137,NC\_012206,NC\_012481,NC\_012482,NC\_012492,NC\_012553,NC\_012554,NC\_012664,NC\_012665,NC\_012786,NC\_012787,NC\_013017,AB007990,AB110218,AB162141,AB192965,AB192966,AB236321,AB236323,AB236325,AB306314,AB439841,AB439842,AB921568,AF105975,AF112352,AF112353,AF141897,AF141922,AF173555,AF173556,AF241479,AF291705,AF291706,AF329886,AF329888,AF329889,AF379637,AF416741,AF416742,AF428255,AF490004,AF491306,AJ132574,AJ132575,AJ223505,AJ224504,AJ311031,AJ314739,AJ314740,AJ319674,AJ420316,AJ420317,AJ420318,AJ457823,AJ4

57824,AJ457985,AJ457986,AJ496286,AJ496287,AJ512761,AJ512762,AJ543429,AJ564742,AJ564743,AJ566744,AJ579307,AJ579308,AJ781302,AJ810156,AJ810157,AJ849916,AJ865337,AJ971263,AM181683,AM183224,AM230634,AM230635,AM261326,AM421522,AM691745,AM712436,AM940137,AM980883,AM989927,AY036009,AY036010,AY090555,AY090556,AY090557,AY090558,AY190290,AY190291,AY650283,AY754814,D00200,D00201,D00940,DQ845787,DQ868525,EF011559,EF015778,EF190217,EF536859,EF536861,EF536868,EF536873,EF536876,EF536878,EF536886,EU024118,EU024119,EU024120,EU273816,EU273817,EU273818,EU365686,EU856366,FJ176701,FJ560719,FJ751234,FM179613,FM210034,FM877474,FN252890,FN256256,FN256257,FN256258,FN256259,FN256260,FN256261,FN256292,FN297834,FN401520,FN436001,GU001879,GU076440,GU076443,GU076445,GU076447,GU076449,GU076451,GU076452,GU076454,GU180085,GU256531,GU440580,GU732203,HE580236,HE616777,HE659516,HE659517,HE793429,HM140364,HM140365,HM140366,HM140368,HM140369,HM140370,HM140371,HM626516,HM626517,HM859902,HM859903,JF451352,JN676150,JN676151,JN680352,JN680353,JN989417,JN989425,JN989441,JN989446,JQ247188,JQ303121,JQ303122,JQ621843,JX082259,JX448368,JX911332,K02029,K02030,KC149941,KC172700,KC427995,KC476655,KF176552

**Genomoviridae**

JN704610,KF371641,KF371642,KP133076,KP133077,KP133078,KP133079,KP133080,NC\_013116,NC\_023844,NC\_023870,NC\_023871,NC\_023872,NC\_024689,NC\_024690,NC\_024691,NC\_024909,NC\_025728,NC\_025729,NC\_025730,NC\_025731,NC\_025732,NC\_025733,NC\_025734,NC\_025735,NC\_025736,NC\_025737,NC\_025738,NC\_025741,NC\_026144,NC\_026161,NC\_026162,NC\_026163,NC\_026164,NC\_026165,NC\_026166,NC\_026167,NC\_026168,NC\_026169,NC\_026254,NC\_026261,NC\_026806,NC\_026807,NC\_026808,NC\_026809,NC\_026810,NC\_026817,NC\_026818,NC\_027776,NC\_027820,NC\_027821,NC\_028459,NC\_028460,NC\_030138,NC\_030139,NC\_030140,NC\_030141,NC\_030142,NC\_030143,NC\_030144,NC\_030145,NC\_030146,NC\_030147,NC\_030447,NC\_030448,NC\_030887,NC\_033270,NC\_033736,NC\_033742,NC\_033743,NC\_033747,NC\_035137,NC\_035138,NC\_035139,NC\_035197,NC\_035477,NC\_037062,NC\_038479,NC\_038480,NC\_038481,NC\_038482,NC\_038483,NC\_038484,NC\_038485,NC\_038486,NC\_038487,NC\_038488,NC\_038489,NC\_038490,NC\_038491,NC\_038492,NC\_038493,NC\_038494,NC\_038495,NC\_038496,NC\_038497,NC\_038498,NC\_038499,NC\_038501,NC\_038502,NC\_040317,NC\_040326,NC\_040327,NC\_040330,NC\_040338,NC\_040339,NC\_040340,NC\_040346,NC\_040347,NC\_040348,NC\_040351,NC\_040370,NC\_040371,NC\_040372,NC\_040379

**Microviridae**

AJ550635,AY751298,DQ079873,DQ079878,DQ079880,DQ079881,DQ079882,DQ079883,DQ079884,DQ079885,DQ079886,DQ079887,DQ079888,DQ079889,DQ079890,DQ079891,DQ079892,DQ079893,DQ079894,DQ079895,DQ079896,DQ079897,DQ079898,DQ079899,DQ079900,DQ079901,DQ079902,DQ079903,DQ079904,DQ079905,DQ079906,DQ079907,DQ079908,DQ079909,KC237308,KC821628,KC821631,KF044309,KF044310,KJ997912,M14428,NC\_001330,NC\_001420,NC\_001422,NC\_001730,NC\_001741,NC\_001998,NC\_002180,NC\_002194,NC\_002643,NC\_003438,NC\_007461,NC\_007817,NC\_007818,NC\_007819,NC\_007820,NC\_007821,NC\_007822,NC\_007823,NC\_007824,NC\_007825,NC\_007827,NC\_007856,NC\_012868,NC\_015785,NC\_021797,NC\_021805,NC\_022790,NC\_026013,NC\_026665,NC\_027633,NC\_027634,NC\_027635,NC\_027636,NC\_027637,NC\_027638,NC\_027639,NC\_027640,NC\_027641,NC\_027642,NC\_027643,NC\_027644,NC\_027645,NC\_027646,NC\_027647,NC\_027648,NC\_028993,NC\_028994,NC\_029012,NC\_029014,NC\_030458,NC\_030472,NC\_030476,NC\_040328,NC\_040329,NC\_040341,NC\_040342,NC\_040349,NC\_040350,NC\_040373,NC\_040374,NC\_040375

**Ortervirales**

AB187566,AB611707,AF033809,AF053745,AF126467,AF221065,AF411814,DQ093792,DQ241301,DQ241302,DQ365814,DQ399707,DQ451009,DQ822073,EF133960,EF494181,EU293537,EU523109,FJ195346,FN692043,HM210570,HQ154630,HQ246218,HQ540591,HQ540595,J01998,JF274252,JF908815,JN032736,JN134185,JQ303225,JX245014,KC802224,KF029431,KF313137,KJ668270,KJ668271,KP284572,M11841,M14008,M16605,M23385,NC\_000858,NC\_001343,NC\_001362,NC\_001364,NC\_001402,NC\_001403,NC\_001407,NC\_001408,NC\_001413,NC\_001414,NC\_001436,NC\_001450,NC\_001452,NC\_001463,NC\_001482,NC\_001488,NC\_001494,NC\_001497,NC\_001499,NC\_001500,NC\_001501,NC\_001502,NC\_001503,NC\_001506,NC\_001511,NC\_001514,NC\_001549,NC\_001550,NC\_001574,NC\_001618,NC\_001634,NC\_001648,NC\_001654,NC\_001702,NC\_001722,NC\_001724,NC\_001725,NC\_001739,NC\_001802,NC\_001815,NC\_001831,NC\_001839,NC\_001866,NC\_001867,NC\_001885,NC\_001914,NC\_001940,NC\_002201,NC\_003031,NC\_003059,NC\_003138,NC\_003323,NC\_003378,NC\_003381,NC\_003382,NC\_003498,NC\_003554,NC\_004036,NC\_004324,NC\_004450,NC\_004455,NC\_004540,NC\_004994,NC\_005947,NC\_006934,NC\_006955,NC\_007002,NC\_007003,NC\_007015,NC\_007654,NC\_007

815,NC\_008017,NC\_008018,NC\_008034,NC\_008094,NC\_009010,NC\_009424,NC\_009889,NC\_010737,NC\_010738,NC\_010820,NC\_010955,NC\_011097,NC\_011546,NC\_011592,NC\_011800,NC\_011920,NC\_012728,NC\_013262,NC\_013455,NC\_014474,NC\_014648,NC\_015116,NC\_015228,NC\_015328,NC\_015502,NC\_015503,NC\_015504,NC\_015505,NC\_015506,NC\_015507,NC\_015655,NC\_015784,NC\_017830,NC\_018105,NC\_018505,NC\_018616,NC\_018858,NC\_020999,NC\_022365,NC\_022517,NC\_022518,NC\_023153,NC\_023485,NC\_024301,NC\_026020,NC\_026238,NC\_026472,NC\_026819,NC\_027117,NC\_027131,NC\_027924,NC\_028462,NC\_029303,NC\_029852,NC\_029853,NC\_030205,NC\_030462,NC\_031326,NC\_033738,NC\_033739,NC\_034252,NC\_035472,NC\_038378,NC\_038379,NC\_038380,NC\_038381,NC\_038382,NC\_038512,NC\_038669,NC\_038858,NC\_038922,NC\_038923,NC\_038986,NC\_038987,NC\_038995,NC\_039022,NC\_039023,NC\_039024,NC\_039025,NC\_039026,NC\_039027,NC\_039028,NC\_039029,NC\_039030,NC\_039031,NC\_039085,NC\_039228,NC\_039238,NC\_039242,NC\_040461,NC\_040462,NC\_040552,NC\_040622,NC\_040635,NC\_040692,NC\_040693,NC\_040712,NC\_040807,NC\_040808,NC\_040809,NC\_040841,NC\_043194,NC\_043195,NC\_043382,NC\_043445,NC\_043491,NC\_043523,NC\_043534,NC\_043535,U04327,U21247,U85505,U85506,U94692,X00255,X13744,X54482,X57540,Y07725,Y13051

**Papillomaviridae**

AB027020,AB027021,AB211993,AB331650,AB331651,AB361563,AB543507,AB793779,AF020905,AF092932,AF151983,AF293960,AF349909,AJ400628,AJ620205,AJ620208,AJ620209,AJ620211,AY395706,AY904722,AY904723,AY904724,D21208,D90252,D90400,DQ080079,DQ080080,DQ080082,DQ080083,DQ090005,DQ098913,DQ098917,DQ180494,DQ344807,EF028290,EF117891,EF422221,EF558838,EF558839,EF558840,EF558841,EF558842,EF558843,EF591300,EU240895,EU360723,EU410347,EU410348,EU410349,EU490515,EU490516,EU493091,EU918769,FJ492742,FJ492743,FJ947080,FM955837,FM955838,FM955839,FM955840,FM955841,FM955842,FN547152,FN598907,FN677755,FN677756,FR751039,GQ180114,GQ227670,GQ244463,GQ246950,GQ246951,GQ845441,GQ845442,GQ845444,GQ845445,GQ845446,GU117620,GU117624,GU117629,GU117630,GU117633,GU129016,HE963025,HG939559,HM999990,HM999991,HM999993,HM999994,HM999995,HM999997,HM999998,HM999999,J04353,JF304766,JF304767,JF304768,JF800658,JF906559,JN171845,JN709469,JN709470,JN709471,JN709472,JQ798171,JX174438,JX899359,KC138720,KC470240,KC858265,KF006398,KF006400,KJ145795,KM085343,KM983393,KP276343,L41216,M12732,M12737,M14119,M20219,M32305,M62877,M73236,M74117,NC\_001352,NC\_001354,NC\_001355,NC\_001356,NC\_001357,NC\_001457,NC\_001458,NC\_001522,NC\_001523,NC\_001524,NC\_001526,NC\_001531,NC\_001541,NC\_001576,NC\_001583,NC\_001586,NC\_001587,NC\_001591,NC\_001593,NC\_001595,NC\_001596,NC\_001605,NC\_001619,NC\_001676,NC\_001678,NC\_001690,NC\_001691,NC\_001693,NC\_001694,NC\_001789,NC\_002232,NC\_003348,NC\_003748,NC\_003973,NC\_004068,NC\_004104,NC\_004195,NC\_004197,NC\_004500,NC\_004765,NC\_005134,NC\_006563,NC\_006564,NC\_006951,NC\_007150,NC\_007612,NC\_008032,NC\_008184,NC\_008188,NC\_008189,NC\_008297,NC\_008298,NC\_008519,NC\_008582,NC\_010107,NC\_010226,NC\_010329,NC\_010739,NC\_010817,NC\_011051,NC\_011109,NC\_011280,NC\_011530,NC\_011765,NC\_012123,NC\_012213,NC\_012485,NC\_012486,NC\_013035,NC\_013117,NC\_013237,NC\_014143,NC\_014185,NC\_014326,NC\_014469,NC\_014952,NC\_014953,NC\_014954,NC\_014955,NC\_014956,NC\_015267,NC\_015268,NC\_015325,NC\_015691,NC\_015692,NC\_016013,NC\_016014,NC\_016074,NC\_016075,NC\_016157,NC\_016898,NC\_017716,NC\_017862,NC\_017993,NC\_017994,NC\_017995,NC\_017996,NC\_017997,NC\_018074,NC\_018075,NC\_018076,NC\_018575,NC\_019023,NC\_019852,NC\_020084,NC\_020085,NC\_020500,NC\_020501,NC\_021472,NC\_021483,NC\_021930,NC\_022095,NC\_022253,NC\_022373,NC\_022647,NC\_022892,NC\_023178,NC\_023496,NC\_023852,NC\_023873,NC\_023882,NC\_023891,NC\_023894,NC\_023895,NC\_024300,NC\_024893,NC\_026640,NC\_026946,NC\_027528,NC\_027779,NC\_028125,NC\_028126,NC\_028267,NC\_028492,NC\_030151,NC\_030795,NC\_030796,NC\_030797,NC\_030798,NC\_030799,NC\_030800,NC\_030801,NC\_030839,NC\_031756,NC\_033740,NC\_033745,NC\_033781,NC\_034616,NC\_035193,NC\_035199,NC\_035201,NC\_035208,NC\_035478,NC\_035479,NC\_037059,NC\_037061,NC\_037064,NC\_037067,NC\_037069,NC\_038516,NC\_038517,NC\_038518,NC\_038519,NC\_038520,NC\_038521,NC\_038522,NC\_038523,NC\_038524,NC\_038525,NC\_038526,NC\_038527,NC\_038531,NC\_038889,NC\_038914,NC\_039036,NC\_039037,NC\_039038,NC\_039039,NC\_039040,NC\_039041,NC\_039042,NC\_039086,NC\_039089,NC\_040548,NC\_040550,NC\_040559,NC\_040578,NC\_040579,NC\_040580,NC\_040583,NC\_040604,NC\_040619,NC\_040620,NC\_040640,NC\_040655,NC\_040688,NC\_040691,NC\_040709,NC\_040727,NC\_040728,NC\_040785,NC\_040787,NC\_040803,NC\_040804,NC\_040805,NC\_040806,NC\_040818,NC\_040827,U06714,U21941,U31778,U31779,U31780,U31781,U31782,U31783,U31784,U31785,U31786,U31787,U31788,U31791,U31793,U31794,U37537,U83595,X05015,X05817,X55964,X55965,X70829,X74462,X74466,X74467,X74468,X74469,X74470,X74471,X74473,X74478,X74479,X74481,X74483,X77858



**Parvoviridae**

AF028704,AF028705,DQ196318,DQ196319,DQ335246,DQ778300,DQ898166,EF441262,EF584447,FJ375127,FJ375128,FJ375129,FJ440683,FJ441297,FJ445512,GQ368252,HM053694,JF429836,JN681175,JQ268283,JQ268284,JX645345,JX827169,KC580640,KF170373,KF214638,KF214640,KF214645,KJ486491,KJ634207,KM105951,KM390024,KM598414,KM598419,KP280068,M81888,NC\_000883,NC\_000936,NC\_001401,NC\_001510,NC\_001539,NC\_001540,NC\_001662,NC\_001701,NC\_001718,NC\_001729,NC\_001829,NC\_001899,NC\_002077,NC\_002190,NC\_003346,NC\_004284,NC\_004285,NC\_004286,NC\_004287,NC\_004288,NC\_004289,NC\_004290,NC\_004295,NC\_004442,NC\_004828,NC\_005040,NC\_005041,NC\_005341,NC\_005889,NC\_006147,NC\_006148,NC\_006152,NC\_006259,NC\_006260,NC\_006261,NC\_006263,NC\_006555,NC\_007018,NC\_007218,NC\_007455,NC\_011317,NC\_011545,NC\_012042,NC\_012564,NC\_012636,NC\_012685,NC\_012729,NC\_014357,NC\_014358,NC\_014468,NC\_014665,NC\_015115,NC\_015718,NC\_016031,NC\_016032,NC\_016647,NC\_016744,NC\_016752,NC\_017823,NC\_018399,NC\_018450,NC\_019492,NC\_020499,NC\_022089,NC\_022104,NC\_022564,NC\_022748,NC\_022800,NC\_023020,NC\_023673,NC\_023842,NC\_023860,NC\_024452,NC\_024453,NC\_024454,NC\_024888,NC\_025825,NC\_025891,NC\_025965,NC\_026251,NC\_026815,NC\_026943,NC\_027429,NC\_028136,NC\_028650,NC\_028973,NC\_029133,NC\_029300,NC\_029797,NC\_030296,NC\_030402,NC\_0304837,NC\_030873,NC\_031450,NC\_031670,NC\_031695,NC\_031751,NC\_031959,NC\_032097,NC\_034445,NC\_034532,NC\_035180,NC\_035185,NC\_035186,NC\_037053,NC\_038532,NC\_038533,NC\_038534,NC\_038535,NC\_038536,NC\_038537,NC\_038538,NC\_038539,NC\_038540,NC\_038541,NC\_038542,NC\_038543,NC\_038544,NC\_038545,NC\_038546,NC\_038547,NC\_038883,NC\_038895,NC\_038898,NC\_039043,NC\_039044,NC\_039045,NC\_039046,NC\_039047,NC\_039048,NC\_039049,NC\_039050,NC\_040533,NC\_040562,NC\_040603,NC\_040623,NC\_040626,NC\_040652,NC\_040671,NC\_040672,NC\_040694,NC\_040695,NC\_040843,NC\_043446,U12469,X01457

**Polydnaviridae**

AY651828,AY651829,AY651830,DQ075354,DQ075355,DQ075356,DQ075357,DQ075358,DQ075359,DQ075360,EF067319,EF067320,EF067321,EF067322,EF067323,EF067324,EF067325,EF067326,EF067327,EF067328,EF067329,EF067330,EF067331,EF067332,NC\_005165,NC\_006633,NC\_006634,NC\_006635,NC\_006636,NC\_006637,NC\_006638,NC\_006639,NC\_006640,NC\_006641,NC\_006642,NC\_006643,NC\_006644,NC\_006645,NC\_006646,NC\_006647,NC\_006648,NC\_006649,NC\_006650,NC\_006651,NC\_006652,NC\_006653,NC\_006654,NC\_006655,NC\_006656,NC\_006657,NC\_006658,NC\_006659,NC\_006660,NC\_006661,NC\_006662,NC\_007028,NC\_007029,NC\_007030,NC\_007031,NC\_007032,NC\_007033,NC\_007034,NC\_007035,NC\_007036,NC\_007037,NC\_007038,NC\_007039,NC\_007040,NC\_007041,NC\_007044,NC\_007985,NC\_007986,NC\_007987,NC\_007988,NC\_007989,NC\_007990,NC\_007991,NC\_007992,NC\_007993,NC\_007994,NC\_007995,NC\_007996,NC\_007998,NC\_007999,NC\_008000,NC\_008001,NC\_008002,NC\_008003,NC\_008004,NC\_008005,NC\_008006,NC\_008007,NC\_008008,NC\_008847,NC\_008848,NC\_008849,NC\_008850,NC\_008851,NC\_008852,NC\_008853,NC\_008854,NC\_008855,NC\_008856,NC\_008857,NC\_008858,NC\_008859,NC\_008860,NC\_008861,NC\_008862,NC\_008863,NC\_008864,NC\_008865,NC\_008866,NC\_008867,NC\_008868,NC\_008869,NC\_008870,NC\_008871,NC\_008872,NC\_008873,NC\_008874,NC\_008875,NC\_008876,NC\_008877,NC\_008878,NC\_008879,NC\_008880,NC\_008881,NC\_008882,NC\_008883,NC\_008884,NC\_008885,NC\_008886,NC\_008887,NC\_008888,NC\_008889,NC\_008890,NC\_008891,NC\_008892,NC\_008893,NC\_008894,NC\_008895,NC\_008896,NC\_008897,NC\_008898,NC\_008899,NC\_008900,NC\_008901,NC\_008902,NC\_008903,NC\_008904,NC\_008905,NC\_008906,NC\_008907,NC\_008908,NC\_008909,NC\_008910,NC\_008911,NC\_008912,NC\_008913,NC\_008914,NC\_008915,NC\_008916,NC\_008917,NC\_008918,NC\_008919,NC\_008920,NC\_008921,NC\_008922,NC\_008923,NC\_008924,NC\_008925,NC\_008926,NC\_008927,NC\_008928,NC\_008929,NC\_008930,NC\_008931,NC\_008932,NC\_008933,NC\_008934,NC\_008935,NC\_008936,NC\_008937,NC\_008938,NC\_008939,NC\_008940,NC\_008941,NC\_008946,NC\_008947,NC\_008948,NC\_008949,NC\_008950,NC\_008951,NC\_008952,NC\_008953,NC\_008954,NC\_008955,NC\_008956,NC\_008957,NC\_008958,NC\_008959,NC\_008960,NC\_008961,NC\_008962,NC\_008963,NC\_008964,NC\_008965,NC\_008966,NC\_008967,NC\_008968,NC\_008969,NC\_008970,NC\_008971,NC\_008972,NC\_008973,NC\_008976,NC\_008977,NC\_008978,NC\_008979,NC\_008980,NC\_008981,NC\_008982,NC\_008983,NC\_008984,NC\_008985,NC\_008986,NC\_008987,NC\_008988,NC\_008989,NC\_008990,NC\_008991,NC\_008992,NC\_008993,NC\_008994,NC\_008995,NC\_008996,NC\_008997,NC\_008998,NC\_008999,NC\_009000,NC\_009001,NC\_009002,NC\_009003,NC\_043261,NC\_043262,NC\_043263,NC\_043264,NC\_043265,NC\_043266,NC\_043267,NC\_043270,NC\_043271,NC\_043273,NC\_043307,NC\_043308,NC\_043309,NC\_043310,NC\_043311,NC\_043312,NC\_043315,NC\_043316,NC\_043318,NC\_043319,NC\_043320,NC\_043321,NC\_043322,NC\_043323,NC\_043324,NC\_043325,NC\_043326,NC\_043327,NC\_043328,NC\_043329,NC\_043330,NC\_043331,NC\_043332,NC\_043333,NC\_043334,NC\_043335,NC\_043336,NC\_043337,NC\_043



DQ648856,DQ648857,DQ658413,DQ811787,DQ812092,DQ812093,DQ848678,DQ851494,DQ902712,DQ902713,DQ911368,DQ915164,DQ995634,DQ995640,DQ995647,EF011023,EF014462,EF015886,EF017707,EF065505,EF065506,EF065507,EF065508,EF065509,EF065510,EF065511,EF065512,EF065513,EF065514,EF065515,EF065516,EF067923,EF067924,EF107097,EF108464,EF173414,EF173415,EF173420,EF173423,EF173425,EF424615,EF424616,EF424617,EF424618,EF424619,EF424620,EF424621,EF424622,EF424623,EF424624,EF424625,EF424626,EF424627,EF424628,EF424629,EF429197,EF429198,EF429199,EF429200,EF446132,EF446615,EF552688,EF552689,EF552690,EF552691,EF552692,EF552693,EF552694,EF552695,EF552696,EF552697,EF555644,EF555645,EF558545,EF667343,EF667344,EU004663,EU004664,EU004665,EU004666,EU004667,EU004668,EU004669,EU004670,EU004671,EU004672,EU004673,EU004674,EU004675,EU004676,EU004677,EU004678,EU004679,EU004680,EU004681,EU004682,EU004683,EU020009,EU037962,EU140838,EU143843,EU155216,EU155260,EU371559,EU371560,EU371561,EU371562,EU371563,EU371564,EU420137,EU420138,EU439428,EU563512,EU627591,EU716175,EU755009,EU779803,EU815052,EU854589,FJ009367,FJ355929,FJ355930,FJ376620,FJ387164,FJ415324,FJ425184,FJ425185,FJ425186,FJ425187,FJ425188,FJ425189,FJ434664,FJ445112,FJ445113,FJ445114,FJ445116,FJ445118,FJ445119,FJ445120,FJ445121,FJ445122,FJ445123,FJ445124,FJ445125,FJ445126,FJ445127,FJ445128,FJ445129,FJ445130,FJ445131,FJ445132,FJ445133,FJ445134,FJ445135,FJ445136,FJ445138,FJ445140,FJ445141,FJ445142,FJ445143,FJ445144,FJ445145,FJ445146,FJ445147,FJ445148,FJ445149,FJ445150,FJ445151,FJ445152,FJ445153,FJ445154,FJ445155,FJ445156,FJ445157

**Test-2; Source: Virus-Host-DB**

**Betaflexiviridae**

AF057136,NC\_001946,NC\_038324,NC\_038325,NC\_038966,NC\_039087,NC\_040545,NC\_040554,NC\_040564,NC\_040568,NC\_040616,NC\_040627,NC\_001948,NC\_040630,NC\_040643,NC\_040689,NC\_040703,NC\_040797,NC\_040800,NC\_043081,NC\_043082,NC\_043086,NC\_043087,NC\_002468,NC\_043088,NC\_043412,NC\_002500,NC\_002552,NC\_002729,NC\_002795,NC\_003462,NC\_003499,NC\_003557,AY646511,NC\_003602,NC\_003604,NC\_003689,NC\_003870,NC\_003877,NC\_005138,NC\_005343,NC\_006550,NC\_006946,NC\_007289,EU020009,NC\_008020,NC\_008266,NC\_008292,NC\_008552,NC\_009087,NC\_009383,NC\_009759,NC\_009764,NC\_009892,NC\_009991,FJ009367,NC\_010305,NC\_010538,NC\_011062,NC\_011106,NC\_011525,NC\_011540,NC\_011552,NC\_012038,NC\_012210,NC\_012519,JF320811,NC\_012869,NC\_013006,NC\_013527,NC\_014730,NC\_014821,NC\_015220,NC\_015395,NC\_015782,NC\_016080,NC\_016404,JX559646,NC\_016440,NC\_017859,NC\_018175,NC\_018448,NC\_018458,NC\_018714,NC\_019025,NC\_019029,NC\_019030,NC\_020996,NC\_001361,NC\_023295,NC\_023892,NC\_024449,NC\_024686,NC\_025388,NC\_025468,NC\_025469,NC\_026248,NC\_026616,NC\_027527,NC\_001409,NC\_028111,NC\_028868,NC\_028975,NC\_029085,NC\_029086,NC\_029087,NC\_029088,NC\_029089,NC\_029301,NC\_030657,NC\_001749,NC\_030926,NC\_031089,NC\_034264,NC\_034376,NC\_034377,NC\_034833,NC\_035202,NC\_035203,NC\_035462,NC\_037058

**Bromoviridae**

AJ276479,AJ276480,AJ276481,NC\_001440,NC\_001495,NC\_002024,NC\_002025,NC\_002026,NC\_002027,NC\_002028,NC\_002034,NC\_002035,NC\_002038,NC\_002039,NC\_002040,NC\_003451,NC\_003452,NC\_003453,NC\_003464,NC\_003465,NC\_003480,NC\_003541,NC\_003542,NC\_003543,NC\_003546,NC\_003547,NC\_003548,NC\_003568,NC\_003569,NC\_003570,NC\_003649,NC\_003650,NC\_003651,NC\_003671,NC\_003673,NC\_003674,NC\_003808,NC\_003809,NC\_003810,NC\_003833,NC\_003834,NC\_003835,NC\_003836,NC\_003837,NC\_003838,NC\_003842,NC\_003844,NC\_003845,NC\_004006,NC\_004007,NC\_004008,NC\_004120,NC\_004121,NC\_004122,NC\_004362,NC\_004363,NC\_005848,NC\_005849,NC\_005854,NC\_006064,NC\_006065,NC\_006566,NC\_006567,NC\_006568,NC\_006999,NC\_007000,NC\_007001,NC\_008037,NC\_008038,NC\_008039,NC\_008706,NC\_008707,NC\_008708,NC\_009536,NC\_009537,NC\_009538,NC\_011553,NC\_011554,NC\_011555,NC\_011807,NC\_011808,NC\_011809,NC\_012134,NC\_012135,NC\_012136,NC\_013266,NC\_013267,NC\_013268,NC\_018402,NC\_018403,NC\_018404,NC\_022127,NC\_022128,NC\_022129,NC\_022250,NC\_022251,NC\_022252,NC\_025477,NC\_025478,NC\_025481,NC\_025482,NC\_025483,NC\_025484,NC\_027928,NC\_027929,NC\_027930,NC\_038776,NC\_038777,NC\_039074,NC\_039075,NC\_039076,NC\_040389,NC\_040390,NC\_040391,NC\_040392,NC\_040393,NC\_040394,NC\_040435,NC\_040436,NC\_040437,NC\_040469,NC\_040471

**Caliciviridae**

AB042808,AB187514,AB220921,AB365435,AB447427,AB447428,AB447429,AB447430,AB447431,AB447432,AB447433,AB447434,AB447435,AB447436,AB447437,AB447438,AB447439,AB447440,AB447441,AB447442,AB447443,AB447444,AB447445,AB447446,AB447447,AB447448,AB447449,AB447450

,AB447451,AB447452,AB447453,AB447454,AB447455,AB447456,AB447457,AB447458,AB447459,AB447460,AB447461,AB447462,AB447463,AB541201,AB541202,AB541203,AB541204,AB541205,AB543808,AB614356,AF091736,AF093797,AF145896,AY032605,AY134748,AY485642,AY741811,AY772730,DQ058829,DQ369797,DQ456824,DQ658413,DQ911368,EF014462,EU004663,EU004664,EU004665,EU004666,EU004667,EU004668,EU004669,EU004670,EU004671,EU004672,EU004673,EU004674,EU004675,EU004676,EU004677,EU004678,EU004679,EU004680,EU004681,EU004682,EU004683,EU854589,FJ355929,FJ355930,FJ387164,FJ514242,FJ515294,FJ537135,FJ537136,FJ537137,FJ537138,GQ475301,GQ475302,GU594162,GU980585,GU991353,GU991354,GU991355,HF952119,HF952120,HF952121,HF952122,HF952123,HF952124,HF952125,HF952126,HF952127,HF952128,HF952129,HF952130,HF952131,HF952132,HF952133,HF952134,HF952135,HM002617,HQ009513,HQ392821,HQ449728,HQ664990,JF320644,JF320645,JF320646,JF320647,JF320648,JF320649,JF320650,JF320651,JF320652,JF320653,JF781268,JN400599,JN400600,JN400601,JN400602,JN400603,JN400604,JN400605,JN400606,JN400607,JN400608,JN400609,JN400610,JN400611,JN400612,JN400613,JN400614,JN400615,JN400616,JN400617,JN400618,JN400619,JN400620,JN400621,JN400622,JN400623,JN400624,JN400625,JN400626,JN595867,JQ388274,JQ613567,JQ613568,JQ613569,JQ613570,JQ622197,JQ798158,JQ911594,JQ911595,JQ911596,JQ911597,JQ911598,JX018212,JX023285,JX023286,JX047864,JX126912,JX126913,JX439815,JX439816,JX439817,JX439818,JX439819,JX448566,JX459900,JX459901,JX459902,JX459903,JX459904,JX459905,JX459906,JX459907,JX459908,JX846924,JX846927,JX989073,JX989074,JX989075,JX993277,KC013592,KC175323,KC175342,KC175343,KC175344,KC175345,KC175346,KC175347,KC175348,KC175349,KC175350,KC175351,KC175352,KC175353,KC175354,KC175355,KC175356,KC175357,KC175358,KC175359,KC175360,KC175361,KC175362,KC175363,KC175364,KC175365,KC175366,KC175367,KC175368,KC175369,KC175370,KC175371,KC175372,KC175373,KC175374,KC175375,KC175376,KC175377,KC175378,KC175379,KC175380,KC175381,KC175382,KC175383,KC175384,KC175385,KC175386,KC175387,KC175388,KC175389,KC175390,KC175391,KC175392,KC175393,KC175394,KC175395,KC175396,KC175397,KC175398,KC175399,KC175400,KC175401,KC175402,KC175403,KC175404,KC175405,KC175406,KC175407,KC175408,KC175409,KC175410,KC409301,KC409302,KC463910,KC464496,KC464497,KC464498,KC464499,KC464500,KC577174,KC577175,KC631827,KC792553,KC894731,KC894942,KC894943,KC960615,KF204570,KF306212,KF306213,KF306214,KF429760,KF429761,KF429765,KF429766,KF429768,KF429770,KF429773,KF429774,KF429776,KF429777,KF429778,KF429783,KF429787,KF429789,KF429790,KF712491,KF712496,KF712497,KF712498,KF712499,KF712501,KF712502,KF712504,KF712510,KJ196276,KJ196277,KJ196278,KJ196279,KJ196280,KJ196281,KJ196282,KJ196283,KJ196284,KJ196285,KJ196286,KJ196287,KJ196288,KJ196289,KJ196293,KJ196294,KJ196295,KJ196296,KJ196297,KJ196298,KJ196299,KJ407072,KJ407073,KJ407074,KJ407075,KJ407076,KJ508818,KJ541743,KJ649705,KJ685403,KJ685405,KJ685408,KJ685412,KJ685413,KJ685414,KJ685415,KJ685417,KM272334,NC\_000940,NC\_001481,NC\_001543,NC\_001959,NC\_002551,NC\_002615,NC\_004064,NC\_004541,NC\_004542,NC\_006269,NC\_006554,NC\_006875,NC\_007916,NC\_008311,NC\_008580,NC\_010624,NC\_011050,NC\_011704,NC\_012699,NC\_017936,NC\_019712,NC\_024031,NC\_024078,NC\_025676,NC\_027026,NC\_027122,NC\_029645,NC\_029646,NC\_029647,NC\_030793,NC\_031324,NC\_033081,NC\_033776,NC\_034444,NC\_035675,NC\_039475,NC\_039476,NC\_039477,NC\_039897,NC\_040674,NC\_040876,NC\_043512,NC\_043516,NC\_044045,NC\_044046,NC\_044047,U15301,U54983,X86557

**Coronaviridae**

MG772933.1, MG772934.1, AC\_000192, AF201929, AY278488, AY278491, AY278554, AY278741, AY350750, AY357075, AY357076, AY394850, AY515512, AY518894, AY646283, AY864805, AY864806, D13096, DQ011855, DQ412042, DQ412043, DQ640652, DQ648794, DQ648856, DQ648857, DQ811787, DQ848678, DQ915164, EF065505, EF065506, EF065507, EF065508, EF065509, EF065510, EF065511, EF065512, EF065513, EF065514, EF065515, EF065516, EF424615, EF424616, EF424617, EF424618, EF424619, EF424620, EF424621, EF424622, EF424623, EF424624, EF446615, EU371559, EU371560, EU371561, EU371562, EU371563, EU371564, EU420137, EU420138, FJ376620, FJ415324, FJ425184, FJ425185, FJ425186, FJ425187, FJ425188, FJ425189, FJ647218, FJ647219, FJ647220, FJ647221, FJ647222, FJ647223, FJ647224, FJ647225, FJ647226, FJ647227, FJ882935, FJ882942, FJ882945, FJ882954, FJ882963, FJ884686, FJ938051, FJ938052, FJ938053, FJ938054, FJ938055, FJ938056, FJ938057, FJ938058, FJ938059, FJ938060, FJ938061, FJ938062, FJ938063, FJ938064, FJ938065, FJ938066, FJ938067, FN430414, FN430415, GQ153539, GQ153540, GQ153541, GQ153542, GQ153543, GQ153544, GQ153545, GQ153546, GQ153547, GQ153548, GU553361, GU553362, HM211098, HM211099, HM211100, HM211101, HM245926, HQ392469, HQ392470, HQ392471, HQ392472, JF705860, JF792616, JN183882, JN183883, JQ173883, JQ410000, JQ989272, JX169867, JX860640, JX869059, JX993987, JX993988, KC667074, KC776174, KC881005, KC881006, KF367457, KF569996, KF793824, KF906249, KJ473821, KJ481931, KJ567050, KJ601777, KJ601778, KJ601779, KJ601780,

KJ769231,KM820765,KP981395,LM645057,LN610099,NC\_001451,NC\_001846,NC\_002306,NC\_002645,NC\_003045,NC\_003436,NC\_004718,NC\_005831,NC\_006213,NC\_006577,NC\_009019,NC\_009020,NC\_009021,NC\_009657,NC\_009988,NC\_010437,NC\_010438,NC\_010646,NC\_010800,NC\_011547,NC\_011549,NC\_011550,NC\_012936,NC\_014470,NC\_016991,NC\_016992,NC\_016993,NC\_016994,NC\_016995,NC\_016996,NC\_017083,NC\_018871,NC\_019843,NC\_022103,NC\_023760,NC\_025217,NC\_026011,NC\_028752,NC\_028806,NC\_028811,NC\_028814,NC\_028824,NC\_028833,NC\_030292,NC\_030886,NC\_032107,NC\_032730,NC\_034440,NC\_034972,NC\_035191,NC\_038294,NC\_038861,NC\_039207,NC\_039208,BetaCoV/bat/Yunnan/RaTG13/2013|EPI\_ISL\_402131

**Flaviviridae**

NC\_027819,NC\_027998,NC\_027999,NC\_028137,NC\_028377,NC\_029054,NC\_029055,NC\_030289,NC\_030290,NC\_030291,NC\_030400,NC\_030401,NC\_030653,NC\_030791,NC\_031327,NC\_031916,NC\_031947,NC\_031950,NC\_032088,NC\_033693,NC\_033694,NC\_033697,NC\_033698,NC\_033699,NC\_033715,NC\_033721,NC\_033723,NC\_033724,NC\_033725,NC\_033726,NC\_034007,NC\_034017,NC\_034018,NC\_034151,NC\_034204,NC\_034222,NC\_034223,NC\_034224,NC\_034225,NC\_034242,NC\_034442,NC\_035071,NC\_035118,NC\_035187,NC\_035432,NC\_035889,NC\_038425,NC\_038426,NC\_038427,NC\_038428,NC\_038429,NC\_038430,NC\_038431,NC\_038432,NC\_038433,NC\_038434,NC\_038435,NC\_038436,NC\_038437,NC\_038882,NC\_038912,NC\_038964,NC\_039218,NC\_039219,NC\_039237,NC\_040555,NC\_040589,NC\_040610,NC\_040645,NC\_040682,NC\_040776,NC\_040788,NC\_040815,NC\_043110,U70263,Z46258,AB690461,AB795432,AF002227,AF070476,AF091605,AF311056,AF326963,AF407339,AJ132997,AM404308,AM910652,AY554397,AY842931,AY859526,AY863002,AY898809,DQ480514,EF424625,EF424626,EF424627,EF424628,EF424629,EF429197,EF429198,EF429199,EF429200,EU155216,EU155260,FJ654700,GQ275355,HQ231763,JN704144,JN860200,JQ289550,JQ920421,JX196334,JX227952,JX227953,JX227954,JX227955,JX227958,JX227960,JX227962,JX227963,JX227965,JX227967,JX227970,JX227972,JX227979,JX477686,KC815310,KC815311,KC990542,KF907503,KF917538,KJ469370,KJ660072,KM225263,KM225264,KM225265,KM408491,M91671,NC\_000943,NC\_001437,NC\_001461,NC\_001474,NC\_001475,NC\_001477,NC\_001563,NC\_001564,NC\_001655,NC\_001672,NC\_001710,NC\_001809,NC\_001837,NC\_002031,NC\_002640,NC\_002657,NC\_003635,NC\_003675,NC\_003676,NC\_003678,NC\_003679,NC\_003687,NC\_003690,NC\_003996,NC\_004102,NC\_004119,NC\_005039,NC\_005062,NC\_005064,NC\_006551,NC\_007580,NC\_008604,NC\_008718,NC\_008719,NC\_009026,NC\_009028,NC\_009029,NC\_009823,NC\_009824,NC\_009825,NC\_009826,NC\_009827,NC\_009942,NC\_012532,NC\_012533,NC\_012534,NC\_012671,NC\_012735,NC\_012812,NC\_012932,NC\_015843,NC\_016997,NC\_017086,NC\_018705,NC\_018713,NC\_020902,NC\_021069,NC\_021153,NC\_021154,NC\_023176,NC\_023424,NC\_023439,NC\_024017,NC\_024018,NC\_024077,NC\_024111,NC\_024112,NC\_024113,NC\_024114,NC\_024299,NC\_024377,NC\_024805,NC\_024806,NC\_024889,NC\_025672,NC\_025673,NC\_025677,NC\_025679,NC\_026620,NC\_026623,NC\_026624,NC\_026797,NC\_027709,NC\_027817

**Peribunyaviridae**

NC\_001925,NC\_001926,NC\_004108,NC\_004109,NC\_005775,NC\_005776,NC\_009894,NC\_009895,NC\_018459,NC\_018461,NC\_018463,NC\_018465,NC\_018466,NC\_018467,NC\_018476,NC\_018478,NC\_021242,NC\_021243,NC\_022038,NC\_022039,NC\_022595,NC\_022596,NC\_024074,NC\_024076,NC\_026281,NC\_026283,NC\_026617,NC\_026618,NC\_026619,NC\_027715,NC\_027717,NC\_031135,NC\_031136,NC\_031221,NC\_031222,NC\_031287,NC\_031288,NC\_031291,NC\_031292,NC\_034459,NC\_034460,NC\_034461,NC\_034468,NC\_034475,NC\_034477,NC\_034479,NC\_034482,NC\_034487,NC\_034488,NC\_034489,NC\_034490,NC\_034491,NC\_034492,NC\_034493,NC\_034495,NC\_034497,NC\_034499,NC\_034500,NC\_034504,NC\_034505,NC\_034506,NC\_034631,NC\_034633,NC\_038713,NC\_038714,NC\_038715,NC\_038717,NC\_038718,NC\_038720,NC\_038723,NC\_038724,NC\_038727,NC\_038728,NC\_038729,NC\_038730,NC\_038733,NC\_038734,NC\_038735,NC\_038736,NC\_038738,NC\_038739,NC\_038741,NC\_038742,NC\_038942,NC\_039183,NC\_039184,NC\_039186,NC\_039187,NC\_043036,NC\_043037,NC\_043546,NC\_043548,NC\_043550,NC\_043551,NC\_043552,NC\_043553,NC\_043555,NC\_043556,NC\_043559,NC\_043560,NC\_043561,NC\_043563,NC\_043564,NC\_043565,NC\_043567,NC\_043568,NC\_043570,NC\_043571,NC\_043573,NC\_043575,NC\_043577,NC\_043578,NC\_043579,NC\_043580,NC\_043583,NC\_043584,NC\_043586,NC\_043587,NC\_043588,NC\_043589,NC\_043591,NC\_043592,NC\_043594,NC\_043595,NC\_043597,NC\_043599,NC\_043600,NC\_043602,NC\_043603,NC\_043605,NC\_043607,NC\_043608,NC\_043612,NC\_043614,NC\_043615,NC\_043617,NC\_043618,NC\_043619,NC\_043621,NC\_043623,NC\_043627,NC\_043629,NC\_043630,NC\_043632,NC\_043633,NC\_043634,NC\_043637,NC\_043638,NC\_043639,NC\_043641,NC\_043645,NC\_043646,NC\_043651,NC\_043652,NC\_043653,NC\_043655,NC\_043674,NC\_043675,NC\_043687,NC\_043688,NC\_043690,NC\_043691,NC\_043692,NC\_043694,NC\_043697,NC\_043699

**Phenuiviridae**

NC\_002323,NC\_002324,NC\_002325,NC\_002326,NC\_002327,NC\_002328,NC\_003753,NC\_003754,NC\_003755,NC\_003776,NC\_005214,NC\_005220,NC\_006319,NC\_006320,NC\_014396,NC\_014397,NC\_015373,NC\_015374,NC\_015411,NC\_015412,NC\_015450,NC\_015451,NC\_018136,NC\_018138,NC\_022630,NC\_022631,NC\_023633,NC\_023635,NC\_024494,NC\_024495,NC\_027140,NC\_027141,NC\_029082,NC\_029127,NC\_029128,NC\_029901,NC\_029903,NC\_031138,NC\_031139,NC\_031295,NC\_031298,NC\_031313,NC\_031316,NC\_031317,NC\_031318,NC\_031320,NC\_031321,NC\_032158,NC\_032159,NC\_032257,NC\_032276,NC\_032277,NC\_032278,NC\_032280,NC\_032282,NC\_033830,NC\_033835,NC\_033836,NC\_033838,NC\_033840,NC\_033841,NC\_033842,NC\_033844,NC\_033846,NC\_033847,NC\_033848,NC\_033849,NC\_036597,NC\_036598,NC\_036602,NC\_036604,NC\_036605,NC\_037612,NC\_037614,NC\_037616,NC\_038257,NC\_038258,NC\_038261,NC\_038262,NC\_038748,NC\_038750,NC\_038751,NC\_038752,NC\_038754,NC\_038757,NC\_038934,NC\_039191,NC\_039192,NC\_040450,NC\_040493,NC\_040494,NC\_043045,NC\_043046,NC\_043049,NC\_043051,NC\_043450,NC\_043451,NC\_043477,NC\_043481,NC\_043482,NC\_043509,NC\_043510,NC\_043609,NC\_043611,NC\_043679,NC\_043680,X89628

**Picornaviridae**

AB090161,AB205396,AB252582,AB426611,AB678778,AF039205,AF081485,AF083069,AF123432,AF123433,AF162711,AF230973,AF241359,AF274010,AF311938,AF311939,AF316321,AF327920,AF327921,AF327922,AF352027,AF361253,AF524867,AJ005695,AJ132961,AJ577589,AJ889918,AM235750,AY302539,AY302540,AY302541,AY302542,AY302543,AY302544,AY302545,AY302546,AY302547,AY302548,AY302549,AY302550,AY302551,AY302552,AY302553,AY302554,AY302555,AY302556,AY302557,AY302558,AY302559,AY302560,AY429470,AY462107,AY508697,AY556057,AY556070,AY593765,AY593796,AY593805,AY593806,AY593808,AY593809,AY593840,AY593847,AY593851,AY686687,AY751783,AY773285,AY843297,AY843298,AY843299,AY843300,AY843301,AY843302,AY843303,AY843304,AY843305,AY843306,AY843307,AY843308,AY876912,AY876913,D00239,D00435,D00538,D00627,D00820,D90457,DQ256132,DQ256133,DQ256134,DQ294633,DQ315670,DQ358078,DQ473486,DQ473488,DQ473489,DQ473490,DQ473491,DQ473492,DQ473493,DQ473494,DQ473497,DQ473499,DQ473500,DQ473504,DQ473505,DQ473506,DQ473507,DQ473508,DQ473510,DQ473511,DQ812092,DQ812093,DQ902712,DQ902713,DQ995634,DQ995640,DQ995647,EF015886,EF067923,EF067924,EF107097,EF173414,EF173415,EF173420,EF173423,EF173425,EF552688,EF552689,EF552690,EF552691,EF552692,EF552693,EF552694,EF552695,EF552696,EF552697,EF555644,EF555645,EF667343,EF667344,EU140838,EU716175,EU755009,EU815052,FJ445112,FJ445113,FJ445114,FJ445116,FJ445118,FJ445119,FJ445120,FJ445121,FJ445122,FJ445123,FJ445124,FJ445125,FJ445126,FJ445127,FJ445128,FJ445129,FJ445130,FJ445131,FJ445132,FJ445133,FJ445134,FJ445135,FJ445136,FJ445138,FJ445140,FJ445141,FJ445142,FJ445143,FJ445144,FJ445145,FJ445146,FJ445147,FJ445148,FJ445149,FJ445150,FJ445151,FJ445152,FJ445153,FJ445154,FJ445155,FJ445156,FJ445157,FJ445160,FJ445161,FJ445162,FJ445163,FJ445164,FJ445165,FJ445167,FJ445168,FJ445169,FJ445170,FJ445171,FJ445172,FJ445173,FJ445174,FJ445175,FJ445176,FJ445178,FJ445179,FJ445180,FJ445181,FJ445182,FJ445183,FJ445185,FJ445186,FJ445187,FJ445188,FJ445189,FJ445190,FM955278,GQ122332,GQ249161,GQ323774,GQ485310,GQ485311,GQ865517,HM185056,HM777023,HQ400942,HQ654774,HQ702854,HQ728260,HQ728261,HQ728262,HQ875059,JF905564,JN088541,JN379039,JN710381,JQ277724,JQ814852,JQ818253,JQ898342,JQ911763,JQ975417,JX050181,JX174177,JX262382,JX491648,JX961709,JX982257,KC663628,KC811837,KF312882,KF422142,KF831027,KF874626,KF958308,KF990476,KJ857508,KM203656,KM609480, KP036483,L24917,LK021688,M12197,M16560,M20301,NC\_001366,NC\_001430,NC\_001472,NC\_001479,NC\_001489,NC\_001490,NC\_001612,NC\_001617,NC\_001859,NC\_001897,NC\_001918,NC\_002058,NC\_003976,NC\_003983,NC\_003985,NC\_003987,NC\_003988,NC\_003990,NC\_004421,NC\_004441,NC\_004451,NC\_006553,NC\_008250,NC\_008714,NC\_009448,NC\_009891,NC\_009996,NC\_010354,NC\_010415,NC\_010810,NC\_011349,NC\_011829,NC\_012798,NC\_012800,NC\_012801,NC\_012802,NC\_012957,NC\_012986,NC\_013695,NC\_014411,NC\_014412,NC\_014413,NC\_015626,NC\_015934,NC\_015936,NC\_015940,NC\_015941,NC\_016156,NC\_016403,NC\_016769,NC\_018226,NC\_018400,NC\_018506,NC\_018668,NC\_021178,NC\_021201,NC\_021220,NC\_021482,NC\_022332,NC\_022802,NC\_023162,NC\_023422,NC\_023858,NC\_023861,NC\_023984,NC\_023985,NC\_023987,NC\_023988,NC\_024070,NC\_024073,NC\_024120,NC\_024765,NC\_024766,NC\_024767,NC\_024768,NC\_024769,NC\_024770,NC\_025114,NC\_025432,NC\_025474,NC\_025675,NC\_025890,NC\_025961,NC\_026249,NC\_026314,NC\_026315,NC\_026316,NC\_026470,NC\_026921,NC\_027054,NC\_027214,NC\_027818,NC\_027918,NC\_027919,NC\_028363,NC\_028364,NC\_028365,NC\_028366,NC\_028380,NC\_028964,NC\_028970,NC\_028981,NC\_029854,NC\_029905,NC\_030454,NC\_030843,NC\_031105,NC\_031106,NC\_032126,NC\_033695,NC\_033793,NC\_033818,NC\_033819,NC\_033820,NC\_034206,NC\_034245,NC\_034267,NC\_034381,NC\_034385,NC\_034453,NC\_034617,NC\_034971,NC\_035110,NC\_035198,NC\_035779,NC\_036

588,NC\_037654,NC\_038303,NC\_038304,NC\_038305,NC\_038306,NC\_038307,NC\_038308,NC\_038309,NC\_038310,NC\_038311,NC\_038312,NC\_038313,NC\_038314,NC\_038315,NC\_038316,NC\_038317,NC\_038318,NC\_038319,NC\_038878,NC\_038880,NC\_038957,NC\_038961,NC\_038989,NC\_039004,NC\_039209,NC\_039210,NC\_039211,NC\_039212,NC\_039235,NC\_040605,NC\_040611,NC\_040642,NC\_040673,NC\_040684,NC\_043071,NC\_043072,NC\_043544,U05876,U16283,U22521,V01149,X00925,X05690,X56019,X67706,X77708,X84981,X92886

**Potyviriidae**

AB194796,AJ889866,AJ889867,AJ889868,AM113988,AM157175,AY010722,AY575773,D00507,DQ851494,EF017707,EF558545,EU563512,HE608963,HE608964,HF585099,HF585103,HM590055,JQ924285,JQ924286,NC\_000947,NC\_001445,NC\_001517,NC\_001555,NC\_001616,NC\_001671,NC\_001768,NC\_001785,NC\_001814,NC\_001841,NC\_001886,NC\_002349,NC\_002350,NC\_002509,NC\_002600,NC\_002634,NC\_002990,NC\_002991,NC\_003224,NC\_003377,NC\_003397,NC\_003398,NC\_003399,NC\_003482,NC\_003483,NC\_003492,NC\_003501,NC\_003536,NC\_003537,NC\_003605,NC\_003606,NC\_003742,NC\_003797,NC\_004010,NC\_004011,NC\_004013,NC\_004016,NC\_004017,NC\_004035,NC\_004039,NC\_004047,NC\_004426,NC\_004573,NC\_004752,NC\_005028,NC\_005029,NC\_005136,NC\_005288,NC\_005304,NC\_005778,NC\_005903,NC\_005904,NC\_006262,NC\_006941,NC\_007147,NC\_007180,NC\_007216,NC\_007433,NC\_007728,NC\_007913,NC\_008028,NC\_008393,NC\_008558,NC\_008824,NC\_009741,NC\_009742,NC\_009744,NC\_009745,NC\_009805,NC\_009994,NC\_009995,NC\_010521,NC\_010735,NC\_010736,NC\_010954,NC\_011541,NC\_011560,NC\_011918,NC\_012698,NC\_012799,NC\_013261,NC\_014037,NC\_014038,NC\_014064,NC\_014252,NC\_014325,NC\_014327,NC\_014536,NC\_014742,NC\_014790,NC\_014791,NC\_014898,NC\_014905,NC\_015393,NC\_015394,NC\_016044,NC\_016159,NC\_016441,NC\_017824,NC\_017967,NC\_017970,NC\_017977,NC\_018093,NC\_018176,NC\_018455,NC\_018572,NC\_018833,NC\_018872,NC\_019031,NC\_019409,NC\_019412,NC\_019415,NC\_020072,NC\_020105,NC\_020896,NC\_021065,NC\_021197,NC\_021786,NC\_022745,NC\_023014,NC\_023175,NC\_023628,NC\_024471,NC\_025250,NC\_025254,NC\_025821,NC\_026615,NC\_026759,NC\_027210,NC\_027706,NC\_028144,NC\_028145,NC\_029051,NC\_029076,NC\_030118,NC\_030236,NC\_030293,NC\_030391,NC\_030794,NC\_030840,NC\_030847,NC\_031339,NC\_032912,NC\_034208,NC\_034273,NC\_034835,NC\_035134,NC\_035458,NC\_035459,NC\_035461,NC\_036802,NC\_037051,NC\_038560,NC\_038561,NC\_038562,NC\_038920,NC\_038984,NC\_039002,NC\_039088,NC\_040507,NC\_040508,NC\_040650,NC\_040802,NC\_040836,NC\_043133,NC\_043141,NC\_043149,NC\_043165,NC\_043168,NC\_043171,NC\_043172,NC\_043424,NC\_043532,NC\_043536,NC\_043537,U05771

**Reoviridae**

AF389452,AF389453,AF389454,AF389455,AF389456,AF389462,AF389463,AF389464,AF389465,AF389466,AM498051,AM498052,AM498053,AM744987,AM744988,AM744989,AM744997,AM744998,AM744999,AM745007,AM745008,AM745009,AM745017,AM745018,AM745019,AM745027,AM745028,AM745029,AM745035,AM745037,AM745038,AM745039,AM745047,AM745048,AM745049,AM745057,AM745058,AM745059,AM745067,AM745068,AM745069,AM745077,AM745078,AM745079,FN563984,HG513046,NC\_002557,NC\_002558,NC\_002559,NC\_002560,NC\_002567,NC\_003006,NC\_003007,NC\_003008,NC\_003009,NC\_003010,NC\_003016,NC\_003017,NC\_003018,NC\_003019,NC\_003020,NC\_003654,NC\_003655,NC\_003656,NC\_003657,NC\_003658,NC\_003659,NC\_003696,NC\_003697,NC\_003698,NC\_003699,NC\_003700,NC\_003701,NC\_003702,NC\_003703,NC\_003728,NC\_003729,NC\_003730,NC\_003734,NC\_003735,NC\_003736,NC\_003737,NC\_003749,NC\_003750,NC\_003751,NC\_003752,NC\_003759,NC\_003761,NC\_003762,NC\_003771,NC\_003772,NC\_003773,NC\_003774,NC\_004181,NC\_004182,NC\_004183,NC\_004184,NC\_004185,NC\_004186,NC\_004187,NC\_004188,NC\_004210,NC\_004211,NC\_004212,NC\_004213,NC\_004214,NC\_004217,NC\_004218,NC\_004219,NC\_005166,NC\_005167,NC\_005168,NC\_005169,NC\_005170,NC\_005171,NC\_005986,NC\_005989,NC\_005990,NC\_005996,NC\_005997,NC\_005998,NC\_005999,NC\_006000,NC\_006013,NC\_006014,NC\_006017,NC\_006021,NC\_006023,NC\_007154,NC\_007155,NC\_007157,NC\_007158,NC\_007159,NC\_007160,NC\_007163,NC\_007524,NC\_007525,NC\_007533,NC\_007534,NC\_007535,NC\_007536,NC\_007546,NC\_007547,NC\_007548,NC\_007549,NC\_007550,NC\_007551,NC\_007559,NC\_007560,NC\_007561,NC\_007562,NC\_007563,NC\_007572,NC\_007574,NC\_007582,NC\_007583,NC\_007584,NC\_007586,NC\_007592,NC\_007656,NC\_007657,NC\_007658,NC\_007666,NC\_007667,NC\_007668,NC\_007669,NC\_007670,NC\_007736,NC\_007737,NC\_007738,NC\_007739,NC\_007748,NC\_007749,NC\_007750,NC\_008171,NC\_008172,NC\_008173,NC\_008174,NC\_008175,NC\_008729,NC\_008730,NC\_008731,NC\_008732,NC\_008733,NC\_008735,NC\_008736,NC\_009243,NC\_009244,NC\_009247,NC\_009248,NC\_009249,NC\_010584,NC\_010585,NC\_010586,NC\_010587,NC\_010588,NC\_010589,NC\_010666,NC\_010667,NC\_010668,NC\_010669,NC\_010670,NC\_010743,NC\_010744,NC\_010745,NC\_010746,NC\_010747,NC\_010748,NC\_011506,NC\_011507,NC\_011508,NC\_011510,NC\_012535,NC\_012536,NC\_012537,NC\_012538,NC\_012539,NC\_012

754,NC\_012755,NC\_013225,NC\_013226,NC\_013227,NC\_013228,NC\_013229,NC\_013230,NC\_013396,NC\_013397,NC\_013398,NC\_014236,NC\_014237,NC\_014238,NC\_014239,NC\_014240,NC\_014241,NC\_014511,NC\_014512,NC\_014513,NC\_014514,NC\_014522,NC\_014523,NC\_014598,NC\_014599,NC\_014600,NC\_014601,NC\_014602,NC\_014708,NC\_014709,NC\_014710,NC\_014714,NC\_014715,NC\_014716,NC\_014717,NC\_015126,NC\_015127,NC\_015128,NC\_015129,NC\_015130,NC\_015877,NC\_015878,NC\_015879,NC\_015880,NC\_015881,NC\_016874,NC\_016875,NC\_016876,NC\_016879,NC\_016880,NC\_016881,NC\_020439,NC\_020440,NC\_020441,NC\_020442,NC\_020447,NC\_021541,NC\_021543,NC\_021545,NC\_021551,NC\_021580,NC\_021581,NC\_021589,NC\_021590,NC\_021625,NC\_021626,NC\_021630,NC\_021631,NC\_022553,NC\_022554,NC\_022555,NC\_022620,NC\_022626,NC\_022627,NC\_022633,NC\_022634,NC\_022639,NC\_023420,NC\_023486,NC\_023487,NC\_023488,NC\_023491,NC\_023492,NC\_023813,NC\_023814,NC\_023815,NC\_023816,NC\_023819,NC\_023820,NC\_024503,NC\_024504,NC\_024505,NC\_024506,NC\_024507,NC\_024916,NC\_024917,NC\_024918,NC\_024919,NC\_025485,NC\_025486,NC\_025487,NC\_025488,NC\_025493,NC\_025801,NC\_025802,NC\_025803,NC\_025804,NC\_025808,NC\_025845,NC\_025846,NC\_025847,NC\_025848,NC\_025849,NC\_025850,NC\_025851,NC\_026825,NC\_026826,NC\_026827,NC\_026828,NC\_027533,NC\_027534,NC\_027535,NC\_027539,NC\_027553,NC\_027554,NC\_027567,NC\_027568,NC\_027569,NC\_027572,NC\_027574,NC\_027803,NC\_027808,NC\_027809,NC\_027811,NC\_027812,NC\_027816,NC\_028465,NC\_029904,NC\_029911,NC\_029912,NC\_029913,NC\_029914,NC\_029917,NC\_029918,NC\_030158,NC\_030159,NC\_030160,NC\_030161,NC\_030162,NC\_030163,NC\_030405,NC\_030406,NC\_030412,NC\_030413,NC\_030414,NC\_030415,NC\_033782,NC\_033783,NC\_033784,NC\_034168,NC\_034169,NC\_034170,NC\_034171,NC\_034172,NC\_035935,NC\_035936,NC\_036468,NC\_036469,NC\_036470,NC\_036471,NC\_036476,NC\_036477,NC\_037570,NC\_037571,NC\_037572,NC\_037573,NC\_037574,NC\_037578,NC\_037579,NC\_037580,NC\_037581,NC\_037582,NC\_037583,NC\_038564,NC\_038565,NC\_038568,NC\_038570,NC\_038574,NC\_038575,NC\_038582,NC\_038584,NC\_038588,NC\_038592,NC\_038594,NC\_038595,NC\_038600,NC\_038604,NC\_038605,NC\_038610,NC\_038614,NC\_038615,NC\_038620,NC\_038624,NC\_038625,NC\_038629,NC\_038630,NC\_038634,NC\_038635,NC\_038636,NC\_038637,NC\_038640,NC\_038641,NC\_038645,NC\_038648,NC\_038649,NC\_038652,NC\_038657,NC\_038660,NC\_038661,NC\_038662,NC\_038664,NC\_038665,NC\_038945,NC\_038948,NC\_040408,NC\_040409,NC\_040413,NC\_040414,NC\_040440,NC\_040443,NC\_040444,NC\_040445,NC\_040447,NC\_040472,NC\_040473,NC\_040476,NC\_040478,NC\_040479,NC\_040499,NC\_040501,NC\_040502,NC\_040503,NC\_040504,NC\_040506,NC\_043180,NC\_043182,NC\_043183,NC\_043184,NC\_043185,NC\_043190,NC\_043368,NC\_043369,NC\_043370

**Rhabdoviridae**

KC519324,KC685626,KP688373,NC\_000855,NC\_000903,NC\_001542,NC\_001560,NC\_001615,NC\_001652,NC\_002251,NC\_002526,NC\_002803,NC\_003243,NC\_003746,NC\_005093,NC\_005974,NC\_005975,NC\_006429,NC\_006942,NC\_007020,NC\_007642,NC\_008514,NC\_009527,NC\_009528,NC\_009608,NC\_009609,NC\_011532,NC\_011558,NC\_011568,NC\_011639,NC\_013135,NC\_013955,NC\_016136,NC\_017685,NC\_017714,NC\_018381,NC\_018629,NC\_020803,NC\_020804,NC\_020805,NC\_020806,NC\_020807,NC\_020808,NC\_020809,NC\_020810,NC\_022580,NC\_022581,NC\_022755,NC\_024473,NC\_025251,NC\_025253,NC\_025255,NC\_025340,NC\_025341,NC\_025342,NC\_025353,NC\_025356,NC\_025358,NC\_025359,NC\_025362,NC\_025364,NC\_025365,NC\_025371,NC\_025376,NC\_025377,NC\_025378,NC\_025382,NC\_025384,NC\_025385,NC\_025387,NC\_025389,NC\_025391,NC\_025393,NC\_025394,NC\_025395,NC\_025396,NC\_025397,NC\_025399,NC\_025400,NC\_025401,NC\_025405,NC\_025406,NC\_025408,NC\_028230,NC\_028231,NC\_028232,NC\_028234,NC\_028236,NC\_028237,NC\_028239,NC\_028241,NC\_028244,NC\_028246,NC\_028255,NC\_028266,NC\_028867,NC\_030451,NC\_031079,NC\_031083,NC\_031093,NC\_031215,NC\_031216,NC\_031225,NC\_031227,NC\_031232,NC\_031236,NC\_031240,NC\_031268,NC\_031272,NC\_031273,NC\_031276,NC\_031278,NC\_031282,NC\_031283,NC\_031301,NC\_031303,NC\_031305,NC\_031690,NC\_031691,NC\_031955,NC\_031957,NC\_031958,NC\_031988,NC\_033701,NC\_033705,NC\_034240,NC\_034443,NC\_034447,NC\_034448,NC\_034449,NC\_034450,NC\_034451,NC\_034454,NC\_034508,NC\_034529,NC\_034530,NC\_034531,NC\_034533,NC\_034534,NC\_034535,NC\_034536,NC\_034537,NC\_034538,NC\_034539,NC\_034540,NC\_034541,NC\_034542,NC\_034543,NC\_034544,NC\_034545,NC\_034546,NC\_034548,NC\_034549,NC\_034550,NC\_034551,NC\_036390,NC\_038236,NC\_038275,NC\_038276,NC\_038277,NC\_038278,NC\_038279,NC\_038280,NC\_038281,NC\_038282,NC\_038283,NC\_038284,NC\_038285,NC\_038286,NC\_038287,NC\_038755,NC\_038756,NC\_039020,NC\_039021,NC\_039200,NC\_039201,NC\_039202,NC\_039206,NC\_040532,NC\_040599,NC\_040602,NC\_040664,NC\_040669,NC\_040786,NC\_043065,NC\_043066,NC\_043067,NC\_043525,NC\_043538,NC\_043648,NC\_043649,Z93414



**Secoviridae**

NC\_001632,NC\_003003,NC\_003004,NC\_003445,NC\_003446,NC\_003495,NC\_003496,NC\_003502,NC\_003509,NC\_003544,NC\_003545,NC\_003549,NC\_003550,NC\_003615,NC\_003621,NC\_003622,NC\_003623,NC\_003626,NC\_003628,NC\_003693,NC\_003694,NC\_003738,NC\_003741,NC\_003785,NC\_003786,NC\_003787,NC\_003788,NC\_003791,NC\_003792,NC\_003799,NC\_003800,NC\_003839,NC\_003840,NC\_004439,NC\_004440,NC\_005096,NC\_005097,NC\_005266,NC\_005267,NC\_005289,NC\_005290,NC\_006056,NC\_006057,NC\_006271,NC\_006272,NC\_006964,NC\_006965,NC\_008182,NC\_008183,NC\_009013,NC\_009032,NC\_010709,NC\_010710,NC\_010987,NC\_010988,NC\_011189,NC\_011190,NC\_013075,NC\_013076,NC\_013218,NC\_013219,NC\_015414,NC\_015415,NC\_015492,NC\_015493,NC\_016443,NC\_016444,NC\_017938,NC\_017939,NC\_018383,NC\_018384,NC\_020897,NC\_020898,NC\_022004,NC\_022006,NC\_022798,NC\_022799,NC\_023016,NC\_023017,NC\_025479,NC\_025480,NC\_027915,NC\_027926,NC\_027927,NC\_028139,NC\_028146,NC\_029036,NC\_029038,NC\_031763,NC\_031766,NC\_032270,NC\_032271,NC\_033492,NC\_033493,NC\_034214,NC\_034215,NC\_035214,NC\_035215,NC\_035218,NC\_035219,NC\_035220,NC\_035221,NC\_038320,NC\_038744,NC\_038759,NC\_038760,NC\_038761,NC\_038762,NC\_038763,NC\_038764,NC\_038765,NC\_038766,NC\_038767,NC\_038768,NC\_038862,NC\_038863,NC\_039072,NC\_039073,NC\_039077,NC\_039078,NC\_040399,NC\_040400,NC\_040416,NC\_040417,NC\_040586,NC\_043076,NC\_043385,NC\_043388,NC\_043411,NC\_043447,NC\_043448,NC\_043684,NC\_043685

**Test-3a; Source: Virus-Host-DB; NCBI; GISAID**

**Alphacoronavirus**

AY518894,FJ938054,FJ938055,FJ938056,FJ938057,FJ938058,FJ938059,FJ938060,FJ938061,FJ938062,GU553361,D13096,GU553362,HM245926,HQ392469,HQ392470,HQ392471,HQ392472,JN183882,JN183883,JQ410000,JQ989272,DQ811787,LM645057,NC\_002306,NC\_002645,NC\_003436,NC\_005831,NC\_009657,NC\_009988,NC\_010437,NC\_010438,NC\_018871,DQ848678,NC\_022103,NC\_023760,NC\_028752,NC\_028806,NC\_028811,NC\_028814,NC\_028824,NC\_028833,NC\_030292,NC\_032107,EU420137,NC\_032730,NC\_034972,NC\_035191,NC\_038861,EU420138,FJ938051,FJ938052,FJ938053

**Betacoronavirus**

EU371561,EU371562,EU371563,EU371564,FJ415324,FJ425184,FJ425185,FJ425186,FJ425187,FJ425188,FJ425189,FJ647218,FJ647219,FJ647220,FJ647221,FJ647222,FJ647223,FJ647224,FJ647225,FJ647226,FJ647227,FJ882935,FJ882942,FJ882945,FJ882954,FJ882963,FJ884686,FJ938063,FJ938064,FJ938065,FJ938066,FJ938067,GQ153539,GQ153540,GQ153541,GQ153542,GQ153543,GQ153544,GQ153545,GQ153546,GQ153547,GQ153548,HM211098,HM211099,HM211100,HM211101,JF792616,JQ173883,JX169867,JX860640,JX869059,JX993987,JX993988,KC667074,KC776174,KC881005,KC881006,KF367457,KF569996,KF906249,KJ473821,NC\_001846,NC\_003045,NC\_004718,NC\_006213,NC\_006577,NC\_009019,NC\_009020,NC\_009021,NC\_012936,NC\_017083,NC\_019843,NC\_025217,NC\_026011,NC\_030886,NC\_038294,NC\_039207,AC\_000192,AF201929,AY278488,AY278491,AY278554,AY278741,AY350750,AY350755,AY350766,AY394850,AY515512,AY864805,AY864806,DQ011855,DQ412042,DQ412043,DQ640652,DQ648794,DQ648856,DQ648857,DQ915164,EF065505,EF065506,EF065507,EF065508,EF065509,EF065510,EF065511,EF065512,EF065513,EF065514,EF065515,EF065516,EF424615,EF424616,EF424617,EF424618,EF424619,EF424620,EF424621,EF424622,EF424623,EF424624,EF446615,EU371559,EU371560, **MG772933.1**, **MG772934.1**, **EPI\_ISL\_402131**

**Deltacoronavirus**

FJ376620,KJ481931,KJ567050,KJ601777,KJ601778,KJ601779,KJ601780,KJ769231,KM820765, KP981395,NC\_011547,NC\_011549,NC\_011550,NC\_016991,NC\_016992,NC\_016993,NC\_016994,NC\_016995,NC\_016996,NC\_039208

**Gammacoronavirus**

AY646283, FN430414, FN430415, JF705860, KF793824, LN610099, NC\_001451, NC\_010646, NC\_010800

**Test-3b; Source: Virus-Host-DB; GISAID**

**Alphacoronavirus**

JQ989272,JQ410000,DQ811787,FJ938058,NC\_022103,NC\_028752,EU420137,NC\_038861,FJ938051,FJ938056,FJ938059,NC\_034972,NC\_028811,HQ392471,FJ938057,NC\_028824,NC\_028814,FJ938060, HM245926,NC\_028833

|                                                                                                                                                                                                                                                                                                                                                                                                                                                                                                 |
|-------------------------------------------------------------------------------------------------------------------------------------------------------------------------------------------------------------------------------------------------------------------------------------------------------------------------------------------------------------------------------------------------------------------------------------------------------------------------------------------------|
| <b>Betacoronavirus</b>                                                                                                                                                                                                                                                                                                                                                                                                                                                                          |
| EF065513,FJ882942,FJ425185,HM211100,GQ153540,NC_006213,GQ153543,EF424624,FJ647220,FJ938065,EPI_ISL_402131,FJ938066,AY278554,DQ915164,DQ011855,FJ882945,FJ647225,FJ425184,FJ415324,FJ882935                                                                                                                                                                                                                                                                                                      |
| <b>Deltacoronavirus</b>                                                                                                                                                                                                                                                                                                                                                                                                                                                                         |
| FJ376620,KJ481931,KJ567050,KJ601777,KJ601778,KJ601779,KJ601780,KJ769231,KM820765, KP981395,NC_011547,NC_011549,NC_011550,NC_016991,NC_016992,NC_016993,NC_016994,NC_016995,NC_016996,NC_039208                                                                                                                                                                                                                                                                                                  |
| <b>Test-4; Source: Virus-Host-DB; NCBI; GISAID</b>                                                                                                                                                                                                                                                                                                                                                                                                                                              |
| <b>Embecovirus</b>                                                                                                                                                                                                                                                                                                                                                                                                                                                                              |
| AC_000192,EF424620,EF424621,EF424622,EF424623,EF424624,EF446615,FJ415324,FJ425184,FJ425185,FJ425186,AF201929,FJ425187,FJ425188,FJ425189,FJ647218,FJ647219,FJ647220,FJ647221,FJ647222,FJ647223,FJ647224,DQ011855,FJ647225,FJ647226,FJ647227,FJ884686,FJ938063,FJ938064,FJ938065,FJ938066,FJ938067,JF792616,DQ915164,JQ173883,JX169867,JX860640,KF906249,NC_001846,NC_003045,NC_006213,NC_006577,NC_012936,NC_026011,EF424615,EF424616,EF424617,EF424618,EF424619                                 |
| <b>Merbecovirus</b>                                                                                                                                                                                                                                                                                                                                                                                                                                                                             |
| DQ648794,EF065505,EF065506,EF065507,EF065508,EF065509,EF065510,EF065511,EF065512,JX869059,KC667074,KC776174,KJ473821,NC_009019,NC_009020,NC_019843,NC_038294,NC_039207                                                                                                                                                                                                                                                                                                                          |
| <b>Nobecovirus</b>                                                                                                                                                                                                                                                                                                                                                                                                                                                                              |
| EF065513,EF065514,EF065515,EF065516,HM211098,HM211099,HM211100,HM211101,NC_009021,NC_030886                                                                                                                                                                                                                                                                                                                                                                                                     |
| <b>Sarbecovirus</b>                                                                                                                                                                                                                                                                                                                                                                                                                                                                             |
| MG772933.1, MG772934.1, EPI_ISL_402131, FJ882935, FJ882942, FJ882945, FJ882954, FJ882963, GQ153539, GQ153540, GQ153541, GQ153542, GQ153543, GQ153544, GQ153545, GQ153546, GQ153547, GQ153548, JX993987, JX993988, KC881005, KC881006, KF367457, KF569996, NC_004718, AY278488, AY278491, AY278554, AY278741, AY350750, AY357075, AY357076, AY394850, AY515512, AY864805, AY864806, DQ412042, DQ412043, DQ640652, DQ648856, DQ648857, EU371559, EU371560, EU371561, EU371562, EU371563, EU371564 |
| <b>Test-5; Source: Virus-Host-DB; NCBI; GISAID</b>                                                                                                                                                                                                                                                                                                                                                                                                                                              |
| <b>Embecovirus; Merbecovirus; Nobecovirus; Sarbecovirus</b>                                                                                                                                                                                                                                                                                                                                                                                                                                     |
| same as Test-4                                                                                                                                                                                                                                                                                                                                                                                                                                                                                  |
| <b>2019-nCoV</b>                                                                                                                                                                                                                                                                                                                                                                                                                                                                                |
| EPI_ISL_402119, EPI_ISL_402130, EPI_ISL_402132, EPI_ISL_403928, EPI_ISL_403929, EPI_ISL_403930, EPI_ISL_403931, EPI_ISL_403932, EPI_ISL_403933, EPI_ISL_403934, EPI_ISL_403935, EPI_ISL_402120, EPI_ISL_403936, EPI_ISL_403937, EPI_ISL_403962, EPI_ISL_403963, EPI_ISL_404227, EPI_ISL_404228, MN908947.3, EPI_ISL_402121, EPI_ISL_402123, EPI_ISL_402124, EPI_ISL_402125, EPI_ISL_402127, EPI_ISL_402128, EPI_ISL_402129, EPI_ISL_404253, EPI_ISL_404895, EPI_ISL_405839                      |
| <b>Test-6; Source: Virus-Host-DB; NCBI; GISAID</b>                                                                                                                                                                                                                                                                                                                                                                                                                                              |
| <b>Sarbecovirus; 2019-nCoV</b>                                                                                                                                                                                                                                                                                                                                                                                                                                                                  |
| same as Test-5                                                                                                                                                                                                                                                                                                                                                                                                                                                                                  |

**Supplementary Table S3:** Accession IDs of sequences used in Test-1 to Test-6.
